# Supplementary material for: A new monooxygenase from Herbaspirillum huttiense catalyzed highly enantioselective epoxidation of allylbenzenes and allylic alcohols
Source: Royal Society of Chemistry journal article supplement (doi:10.1039/d0cy00081g), 2020-01-01
Supplement: d0cy00081g1.pdf [file d0cy00081g1.pdf]

## ***Electronic Supporting Information (ESI)***

### **A new monooxygenase from *Herbaspirillum huttiense* catalyzed highly enantioselective epoxidation of allylbenzenes and allylic alcohols**

Hui Lin, Yanhong Tang, Shuang Dong, Ruibo Lang, Hongge Chen\*

College of Life Sciences, Henan Agricultural University, 95 Wenhua Road, Zhengzhou,  
450002, China

Email: honggeyz@henau.edu.cn

|                                                                 |     |
|-----------------------------------------------------------------|-----|
| 1. Synthesis of secondary allylic alcohols <b>13a-21a</b>       | S2  |
| 2. Preparation of racemic epoxides                              | S3  |
| 3. The data of the epoxides from the HhMo-catalyzed epoxidation | S5  |
| 4. Table <b>S1-S2</b>                                           | S8  |
| 5. Figure <b>S1-S6</b>                                          | S9  |
| 6. Selected <sup>1</sup> H NMR spectra and HPLC chromatograms   | S12 |
| 7. References                                                   | S34 |

## 1. Synthesis of secondary allylic alcohols 13a-21a

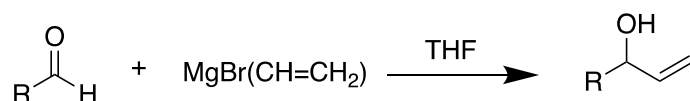

Secondary allylic alcohols **13a-21a** were prepared from the corresponding aldehydes and vinylmagnesium bromide <sup>1</sup>.

**1-Phenyl-prop-2-en-1-ol (13a)**: yellow oil, <sup>1</sup>H NMR (400 MHz, CDCl<sub>3</sub>): δ 7.26-7.40 (m, 5H), 6.02-6.10 (m, 1H), 5.33-5.39 (m, 1H), 5.19-5.23 (m, 2H).

**1-(3-Fluoro-phenyl)-prop-2-en-1-ol (14a)**: colorless oil, <sup>1</sup>H NMR (400 MHz, CDCl<sub>3</sub>): δ 7.29-7.34 (m, 1H), 7.09-7.15 (m, 2H), 6.95-7.00 (m, 1H), 5.97-6.05 (m, 1H), 5.33-5.38 (m, 1H), 5.19-5.30 (m, 2H).

**1-(4-Fluoro-phenyl)-prop-2-en-1-ol (15a)**: colorless oil, <sup>1</sup>H NMR (400 MHz, CDCl<sub>3</sub>): δ 7.32-7.36 (m, 2H), 7.01-7.07 (m, 2H), 5.98-6.06 (m, 1H), 5.31-5.36 (m, 1H), 5.18-5.22 (m, 2H), 1.99 (br, 1H).

**1-Naphthalen-1-yl-prop-2-en-1-ol (16a)**: yellow oil, <sup>1</sup>H NMR (400 MHz, CDCl<sub>3</sub>): δ 8.19-8.21 (m, 1H), 7.80-7.90 (m, 2H), 7.62-7.64 (m, 1H), 7.46-7.56 (m, 3H), 6.22-6.30 (m, 1H), 5.95 (d, *J* = 5.34 Hz, 1H), 5.44-5.49 (m, 1H), 5.27-5.31 (m, 1H).

**1-Naphthalen-2-yl-prop-2-en-1-ol (17a)**: yellow oil, <sup>1</sup>H NMR (400 MHz, CDCl<sub>3</sub>): δ 7.82-7.85 (m, 4H), 7.47-7.50 (m, 3H), 6.09-6.17 (m, 1H), 5.37-5.44 (m, 2H), 5.23-5.27 (m, 1H), 2.12 (br, 1H).

**1-Naphthalen-2-yl-prop-2-en-1-ol (18a)**: yellow oil, <sup>1</sup>H NMR (400 MHz, CDCl<sub>3</sub>): δ 7.53-7.55 (m, 1H), 7.24-7.27 (m, 2H), 6.36-6.44 (m, 1H), 5.66-5.72 (m, 2H), 5.51-5.56 (m, 1H), 2.50-2.51 (m, 1H).

**1-Thiophen-3-yl-prop-2-en-1-ol (19a)**: yellow oil, <sup>1</sup>H NMR (400 MHz, CDCl<sub>3</sub>): δ 7.32 (m, 1H), 7.22-7.23 (m, 1H), 7.07-7.09 (m, 1H), 6.05-6.13 (m, 1H), 5.34-5.39 (m, 1H), 5.27-5.30 (m, 1H), 5.21-5.24 (m, 1H).

**1-Phenyl-but-3-en-2-ol (20a)**: yellow oil,  $^1\text{H NMR}$  (400 MHz,  $\text{CDCl}_3$ ):  $\delta$  7.30-7.34 (m, 2H), 7.23-7.25 (m, 3H), 5.90-5.99 (m, 1H), 5.12-5.28 (m, 2H), 4.33-4.39 (m, 1H), 2.77-2.91 (m, 2H).

**1-Cyclohexyl-prop-2-en-1-ol (21a)**: yellow oil,  $^1\text{H NMR}$  (400 MHz,  $\text{CDCl}_3$ ):  $\delta$  5.82-5.90 (m, 1H), 5.17-5.22 (m, 1H), 5.12-5.16 (m, 1H), 3.83-3.87 (m, 1H), 1.83-1.92 (m, 1H), 1.73-1.77 (m, 2H), 1.65-1.68 (m, 2H), 1.36-1.42 (m, 1H), 1.14-1.26 (m, 5H).

## 2. Preparation of racemic epoxides

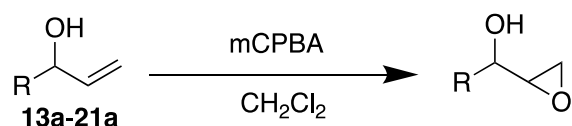

All the racemic epoxides were synthesized from the corresponding alkenes by *meta*-chloroperoxybenzoic acid <sup>2</sup>.

**Oxiranyl-phenyl-methanol**: colorless oil, retention time:  $t_{\text{R}1}$  19.80 min,  $t_{\text{R}2}$  23.5 min,  $t_{\text{R}3}$  24.62 min,  $t_{\text{R}4}$  27.48 min (AS-H, *n*-Hexane: *iso*-propanol = 90: 10, 0.5 mL/min),  $^1\text{H NMR}$  (400 MHz,  $\text{CDCl}_3$ ):  $\delta$  7.33-7.43 (m, 10H), 4.93-4.94 (m, 1H), 4.48 (t,  $J = 4.93, 9.79$  Hz 1H), 3.22-3.25 (m, 1H), 2.97 (dd,  $J = 2.78, 5.05$  Hz, 1H), 2.82-2.87 (m, 2H), 2.76-2.78 (m, 1H), 2.51 (m, 1H), 2.32 (m, 1H).

**(3-Fluoro-phenyl)-oxiranyl-methanol**: colorless oil, retention time:  $t_{\text{R}1}$  9.72 min,  $t_{\text{R}2}$  11.02 min,  $t_{\text{R}3}$  11.90 min (AS-H, *n*-Hexane: *iso*-propanol = 90: 10, 1.0 mL/min),  $^1\text{H NMR}$  (400 MHz,  $\text{CDCl}_3$ ):  $\delta$  7.32-7.37 (m, 2H), 6.99-7.19 (m, 6H), 4.93-4.94 (m, 1H), 4.48-4.50 (m, 1H), 3.19-3.24 (m, 1H), 2.93-2.95 (m, 1H), 2.84 (dd,  $J = 2.72, 4.80$  Hz, 1H), 2.76 (dd,  $J = 2.64, 4.69$  Hz, 1H), 2.58 (d,  $J = 5.10$  Hz, 1H), 2.38 (d,  $J = 2.23$  Hz, 1H).

**(4-Fluoro-phenyl)-oxiranyl-methanol**: yellow oil, retention time:  $t_{\text{R}1}$  10.36 min,  $t_{\text{R}2}$  13.52 min,  $t_{\text{R}3}$  15.51 min (AS-H, *n*-Hexane: *iso*-propanol = 90:10, 1.0 mL/min),  $^1\text{H NMR}$  (400 MHz,  $\text{CDCl}_3$ ):  $\delta$  7.35-7.42 (m, 4H), 7.04-7.09 (m, 4H), 4.92 (d,  $J = 3.00$  Hz, 1H), 4.48 (d,  $J = 5.38$

Hz, 1H), 3.18-3.21 (m, 1H), 2.93-2.95 (m, 1H), 2.86-2.88 (m, 1H), 2.82 (dd,  $J = 2.73, 4.82$  Hz, 1H), 2.77 (dd,  $J = 3.99, 4.97$  Hz, 1H), 2.49 (br, 1H), 2.32 (br, 1H).

**Naphthalen-1-yl-oxiranyl-methanol:** white solid, retention time:  $t_{R1}$  13.82 min,  $t_{R2}$  14.88 min,  $t_{R3}$  16.10 min,  $t_{R4}$  17.69 min (AS-H, *n*-Hexane: *iso*-propanol = 90:10, 1.0 mL/min),  $^1\text{H}$  NMR (400 MHz,  $\text{CDCl}_3$ ):  $\delta$  7.84-7.90 (m, 8H), 7.48-7.54 (m, 6H), 5.11-5.12 (m, 1H), 4.65-4.68 (m, 1H), 3.30-3.34 (m, 1H), 3.01-3.03 (m, 1H), 2.89-2.91 (m, 1H), 2.78-2.81 (m, 1H), 2.53 (br, 1H), 2.37 (br, 1H).

**Naphthalen-2-yl-oxiranyl-methanol:** yellow oil, retention time:  $t_{R1}$  12.89 min,  $t_{R2}$  15.26 min,  $t_{R3}$  17.39 min,  $t_{R4}$  20.06 min (AS-H, *n*-Hexane: *iso*-propanol = 90:10, 1.0 mL/min),  $^1\text{H}$  NMR (400 MHz,  $\text{CDCl}_3$ ):  $\delta$  8.10-8.17 (m, 2H), 7.70-7.90 (m, 4H), 7.67-7.72 (m, 2H), 7.47-7.57 (m, 6H), 5.76-5.77 (m, 1H), 5.30-5.32 (m, 1H), 4.65-4.68 (m, 1H), 3.46-3.50 (m, 1H), 2.93-3.03 (m, 1H), 2.76-2.88 (m, 1H), 2.52 (br, 1H), 2.48 (br, 1H).

**1-Oxiranyl-2-phenyl-ethanol:** colorless oil, retention time:  $t_{R1}$  11.34 min,  $t_{R1}$  13.46 min,  $t_{R2}$  19.32 min,  $t_{R3}$  22.21 min (AS-H, *n*-Hexane: *iso*-propanol = 90:10, 1.0 mL/min),  $^1\text{H}$  NMR (400 MHz,  $\text{CDCl}_3$ ):  $\delta$  7.23-7.34 (m, 10H), 3.99-4.03 (m, 1H), 3.69-3.75 (m, 1H), 3.03-3.06 (m, 2H), 2.79-2.99 (m, 6H), 2.76 (dd,  $J = 4.10, 4.95$ , 1H), 2.62 (dd,  $J = 2.77, 4.93$ , 1H), 2.03 (br, 1H), 1.92 (br, 1H).

**Cyclohexyl-oxiranyl-methanol:** yellow oil, retention time:  $t_{R1}$  12.65 min,  $t_{R2}$  12.81 min,  $t_{R3}$  12.90 min,  $t_{R4}$  13.08 min (chiral GC, CHIRASIL-DEX CB column),  $^1\text{H}$  NMR (400 MHz,  $\text{CDCl}_3$ ):  $\delta$  3.62 (dd,  $J = 3.22, 5.74$  Hz, 1H), 3.14 (dd,  $J = 5.36, 10.90$  Hz, 1H), 3.02-3.08 (m, 2H), 2.81-2.83 (m, 2H), 2.74 (dd,  $J = 4.05, 5.15$  Hz, 1H), 2.70 (dd,  $J = 2.78, 4.97$  Hz, 1H), 1.90-1.95 (m, 2H), 1.65-1.79 (m, 10H), 1.49-1.59 (m, 2H), 1.22-1.30 (m, 8H).

### 3. The data of the epoxides from the HhMo-catalyzed epoxidation

**(S)-allylbenzene oxide (1b):** colorless oil,  $[\alpha]_{\text{D}}^{25} = +13.6$  ( $c = 0.82$  in  $\text{CHCl}_3$ ), 99% ee (AS-H, *n*-Hexane: *iso*-propanol = 90:10, 1.0 mL/min), retention time:  $t_{\text{R}}$  (*R*) 4.78 min,  $t_{\text{R}}$  (*S*) 5.18

min;  $^1\text{H NMR}$  (400 MHz,  $\text{CDCl}_3$ ):  $\delta$  7.25-7.38 (m, 5H), 3.14-3.17 (m, 1H), 2.92 (dd,  $J = 5.47$ , 14.4 Hz, 1H), 2.78-2.84 (m, 2H), 2.55 (dd,  $J = 2.66$ , 4.97 Hz, 1H).

**(S)-2-(3-Fluoro-benzyl)-oxirane (2b)**: colorless oil, 91% ee (AS-H, *n*-Hexane: *iso*-propanol = 90: 10, 1.0 mL/min), retention time:  $t_{\text{R}}$  (*R*) 5.22 min,  $t_{\text{R}}$  (*S*) 5.70 min,  $^1\text{H NMR}$  (400 MHz,  $\text{CDCl}_3$ ):  $\delta$  7.25-7.30 (m, 1H), 6.92-7.04 (m, 3H), 3.13-3.17 (m, 1H), 2.87 (d,  $J = 5.62$  Hz, 2H), 2.80-2.82 (m, 1H), 2.55 (dd,  $J = 2.63$ , 4.94 Hz, 1H).

**(S)-2-(4-Fluoro-benzyl)-oxirane (3b)**: colorless oil, 87% ee (AS-H, *n*-Hexane: *iso*-propanol = 90: 10, 1.0 mL/min), retention time:  $t_{\text{R}}$  (*R*) 5.69 min,  $t_{\text{R}}$  (*S*) 6.18 min,  $^1\text{H NMR}$  (400 MHz,  $\text{CDCl}_3$ ):  $\delta$  7.19-7.26 (m, 2H), 6.98-7.02 (m, 2H), 3.11-3.15 (m, 1H), 2.85 (d,  $J = 5.36$  Hz, 2H), 2.78-2.81 (m, 1H), 2.52 (dd,  $J = 2.64$ , 4.97 Hz, 1H).

**(S)-2-(2-Methyl-benzyl)-oxirane (4b)**: colorless oil, 71% ee (AS-H, *n*-Hexane: *iso*-propanol = 90: 10, 0.5 mL/min), retention time:  $t_{\text{R}}$  (*R*) 4.45 min,  $t_{\text{R}}$  (*S*) 4.81 min,  $^1\text{H NMR}$  (400 MHz,  $\text{CDCl}_3$ ):  $\delta$  7.24-7.34 (m, 4H), 3.24-3.28 (m, 1H), 3.05 (dd,  $J = 5.24$ , 14.78 Hz, 1H), 2.88-2.94 (m, 2H), 2.62 (dd,  $J = 2.64$ , 5.04 Hz, 1H), 2.43 (s, 3H).

**(S)-2-(3-Methyl-benzyl)-oxirane (5b)**: colorless oil, 95% ee (AS-H, *n*-Hexane: *iso*-propanol = 90: 10, 0.5 mL/min), retention time:  $t_{\text{R}}$  (*R*) 8.62 min,  $t_{\text{R}}$  (*S*) 9.27 min,  $^1\text{H NMR}$  (400 MHz,  $\text{CDCl}_3$ ):  $\delta$  7.20-7.24 (m, 1H), 7.05-7.08 (m, 3H), 3.14-3.18 (m, 1H), 2.90 (dd,  $J = 5.64$ , 14.52 Hz, 1H), 2.76-2.82 (m, 2H), 2.62 (dd,  $J = 2.64$ , 4.98 Hz, 1H), 2.36 (s, 3H).

**(S)-2-(4-Methyl-benzyl)-oxirane (6b)**: colorless oil, 92% ee (AS-H, *n*-Hexane: *iso*-propanol = 90: 10, 0.5 mL/min), retention time:  $t_{\text{R}}$  (*R*) 8.88 min,  $t_{\text{R}}$  (*S*) 9.49 min,  $^1\text{H NMR}$  (400 MHz,  $\text{CDCl}_3$ ):  $\delta$  7.12-7.17 (m, 4H), 3.12-3.17 (m, 1H), 2.90 (dd,  $J = 5.59$ , 14.93 Hz, 1H), 2.25-2.81 (m, 2H), 2.62 (dd,  $J = 2.64$ , 5.04 Hz, 1H), 2.35 (s, 3H).

**(S)-2-(2-Methoxy-benzyl)-oxirane (7b)**: yellow oil, 35% ee (AS-H, *n*-Hexane: *iso*-propanol = 90: 10, 1.0 mL/min), retention time:  $t_{\text{R}}$  (*R*) 4.45 min,  $t_{\text{R}}$  (*S*) 4.80 min,  $^1\text{H NMR}$  (400 MHz,

CDCl<sub>3</sub>):  $\delta$  7.19-7.24 (m, 2H), 6.86-6.94 (m, 2H), 3.84 (s, 3H), 2.96 (dd,  $J = 5.34, 14.22$  Hz, 1H), 2.72-2.82 (m, 2H), 2.62 (dd,  $J = 2.68, 5.05$  Hz, 1H).

**(S)-2-(4-Methoxy-benzyl)-oxirane (8b)**: colorless oil, 70% ee (AS-H, *n*-Hexane: *iso*-propanol = 90: 10, 0.5 mL/min), retention time:  $t_R$  (*R*) 14.40 min,  $t_R$  (*S*) 15.94 min, <sup>1</sup>H NMR (400 MHz, CDCl<sub>3</sub>):  $\delta$  7.16-7.18 (m, 2H), 6.85-6.87 (m, 2H), 3.80 (s, 3H), 3.10-3.14 (m, 1H), 2.87 (dd,  $J = 5.64, 14.63$  Hz, 1H), 2.74-2.79 (m, 2H), 2.53 (dd,  $J = 2.64, J = 5.01$  Hz, 1H).

**(S)-2-Phenethyl-oxirane (9b)**: colorless oil, 81% ee (AS-H, *n*-Hexane: *iso*-propanol = 90: 10, 1.0 mL/min), retention time:  $t_R$  (*R*) 4.74 min,  $t_R$  (*S*) 5.35 min, <sup>1</sup>H NMR (400 MHz, CDCl<sub>3</sub>):  $\delta$  7.27-7.32 (m, 2H), 7.19-7.22 (m, 3H), 2.94-2.98 (m, 1H), 2.72-2.87 (m, 3H), 2.48 (dd,  $J = 2.68, 4.95$  Hz, 1H), 1.79-1.93 (m, 2H).

**(S)-2-Phenoxymethyl-oxirane (10b)**: colorless oil, 46% ee (AS-H, *n*-Hexane: *iso*-propanol = 90: 10, 0.5 mL/min), retention time:  $t_R$  (*R*) 15.54 min,  $t_R$  (*S*) 16.42 min, <sup>1</sup>H NMR (400 MHz, CDCl<sub>3</sub>):  $\delta$  7.27-7.31 (m, 2H), 6.92-6.99 (m, 2H), 4.22 (dd,  $J = 3.22, 10.94$  Hz, 1H), 3.98 (dd,  $J = 5.62, 10.94$  Hz, 1H), 3.34-3.38 (m, 1H), 2.90-2.92 (m, 1H), 2.76 (dd,  $J = 2.69, 4.98$  Hz, 1H).

**(1R, 2R)-Oxiranyl-phenyl-methanol (13b)**: colorless oil,  $[\alpha]_D^{25} = -19.8$  ( $c = 1.8$  in CHCl<sub>3</sub>), >99% ee, >99% de (AS-H, *n*-Hexane: *iso*-propanol = 90: 10, 0.5 mL/min), retention time:  $t_R$  27.59 min, <sup>1</sup>H NMR (400 MHz, CDCl<sub>3</sub>):  $\delta$  7.33-7.44 (m, 5H), 4.48 (m, 1H), 3.22-3.25 (m, 1H), 2.83-2.88 (m, 2H), 2.34 (m, 1H).

**(1R, 2R)-(3-Fluoro-phenyl)-oxiranyl-methanol (14b)**: colorless oil, >99% ee, 96% de (AS-H, *n*-Hexane: *iso*-propanol = 90: 10, 1.0 mL/min), retention time:  $t_{R1}$  9.72 min,  $t_{R2}$  11.90 min (major), <sup>1</sup>H NMR (400 MHz, CDCl<sub>3</sub>):  $\delta$  7.32-7.38 (m, 1H), 7.15-7.19 (m, 2H), 7.00-7.05 (m, 1H), 4.49 (d,  $J = 5.37$  Hz, 1H), 3.19-3.22 (m, 1H), 2.88-2.90 (m, 1H), 2.84 (dd,  $J = 2.74, 4.79$  Hz, 1H).

**(1R, 2R)-(4-Fluoro-phenyl)-oxiranyl-methanol (15b)**: yellow oil, >99% ee, >99% de (AS-H, *n*-Hexane: *iso*-propanol = 90: 10, 1.0 mL/min), retention time:  $t_R$  15.60 min,  $^1H$  NMR (400 MHz,  $CDCl_3$ ):  $\delta$  7.38-7.42 (m, 2H), 7.05-7.09 (m, 2H), 4.48 (d,  $J = 5.37$  Hz, 1H), 3.19-3.22 (m, 1H), 2.86-2.88 (m, 1H), 2.83 (dd,  $J = 2.69, 4.80$  Hz, 1H).

**(1R, 2R)-Naphthalen-1-yl-oxiranyl-methanol (16b)**: white solid, >99% ee, 70% de (AS-H, *n*-Hexane: *iso*-propanol= 90:10, 1.0 mL/min), retention time:  $t_R$  15.19 min.

**(1R, 2R)-Naphthalen-2-yl-oxiranyl-methanol (17b)**: yellow oil, >99% ee, >99% de (AS-H, *n*-Hexane: *iso*-propanol = 90: 10, 1.0 mL/min), retention time:  $t_{R3}$  17.74 min.

**(1R, 2R)-Oxiranyl-thiophen-2-yl-methanol (18b)**: yellow oil, >99% ee, >99% de (AS-H, *n*-Hexane: *iso*-propanol = 90: 10, 1.0 mL/min), retention time:  $t_{R4}$  21.51 min,  $^1H$  NMR (400 MHz,  $CDCl_3$ ):  $\delta$  7.31-7.32 (m, 1H), 7.08-7.09 (m, 1H), 7.01-7.03 (m, 1H), 4.78 (d,  $J = 4.92$  Hz, 1H), 3.33-3.36 (m, 1H), 2.86-2.92 (m, 2H), 2.34 (m, 1H).

**(2R, 3R)-Oxiranyl-thiophen-3-yl-methanol (19b)**: yellow oil, >99% ee, >99% de (AS-H, *n*-Hexane: *iso*-propanol = 90: 10, 1.0 mL/min), retention time:  $t_R$  18.2 min,  $^1H$  NMR (400 MHz,  $CDCl_3$ ):  $\delta$  7.33-7.36 (m, 2H), 7.13-7.15 (m, 1H), 4.60 (d,  $J = 5.01$  Hz, 1H), 3.26-3.29 (m, 1H), 2.88-2.90 (m, 1H), 2.84-2.86 (dd,  $J = 2.74, 4.86$  Hz, 1H).

**(1R, 2R)-1-Oxiranyl-2-phenyl-ethanol (20b)**: colorless oil, >99% ee, 91% de, (AS-H, *n*-Hexane: *iso*-propanol= 90:10, 1.0 mL/min), retention time:  $t_R$  (*R*) 11.34 min,  $t_{R3}$  22.4 min (major).

**(1R, 2R)-Cyclohexyl-oxiranyl-methanol (21b)**: yellow oil, >99% ee, >99% de (chiral GC, CHIRASIL-DEX CB column), retention time:  $t_R$  12.81 min,  $^1H$  NMR (400 MHz,  $CDCl_3$ ):  $\delta$  3.15 (dd,  $J = 5.26, 6.65$  Hz, 1H), 3.02-3.05 (m, 1H), 2.82 (dd,  $J = 4.01, 4.94$  Hz, 1H), 2.70 (dd,  $J = 2.77, 4.99$  Hz, 1H), 1.90-1.95 (m, 1H), 1.65-1.77 (m, 5H), 1.52-1.57 (m, 1H), 1.25-1.28 (m, 4H).

#### 4. Table S1-S2

**Table S1.** The selected candidates.

| Gene ID        | Predicted function           | Source              | Identity (%) | E value |
|----------------|------------------------------|---------------------|--------------|---------|
| WP_091504755.1 | monooxygenase                | <i>A. sacchari</i>  | 50           | 2E-135  |
| WP_039783212.1 | alaninephosphoribitol ligase | <i>H. huttiense</i> | 31           | 8E-57   |

**Table S2.** Polymerase chain reaction primers for the amplification of sequences.

| Oligonucleotides |                                                                     |
|------------------|---------------------------------------------------------------------|
| 24a-F            | 5'-AAG CTT GCG GCC GCA-3'                                           |
| 24a-R            | 5'-GTC GAC GGA GCT CGA ATT CG-3'                                    |
| HhMo-F           | 5'-GAA TTC GAG CTC CGT CGA CAT GCG TAG CAT CGC AAT TG-3'            |
| HhMo-R           | 5'-CGA GTG CGG CCG CAA GCT TGG CTG CAA CGG CTA AAG-3'               |
| AsMo-F           | 5'-GAA TTC GAG CTC CGT CGA CAT GGA CGG CAT TGG TAT TG-3'            |
| AsMo-R           | 5'-CGA GTG CGG CCG CAA GCT TCA CGG CAC CAT GGC GGG C-3'             |
| 24HhMo-F         | 5'-ATC CGC TGC CCC TGA ATT AAA AGC TTG CGG CCG CA-3'                |
| 24HhMo-R         | 5'-TTG GAT CAC CTG CAA ATT TAT CAG GCT GCA ACG GCT AAA GCC TTT-3'   |
| pETB-F           | 5'-TGA TAA ATT TGC AGG TGA TCC AAA TGA CGC TAA AGA CAG ATG CG-3'    |
| pETB-R           | 5'-TCC GCT GCC CCT GAA TTA A-3'                                     |
| 24AsMo-F         | 5'-ATC CGC TGC CCC TGA ATT AAA AGC TTG CGG CCG CA-3'                |
| 24AsMo-R         | 5'-TTG GAT CAC CTG CAA ATT TAT TAC ACG GCA CCA TGG CGG GCC AGA T-3' |



## Figure S1-S6

```

MSKRIGIVGAGTAGLHLGLYLRLQHDIDVTIYTDRRPDEYADIRLLNTVAH      50
HSVTIEREVDLGVNHWPESGYFGHYYYVGGPQPLRFYGDLKKPSRAVDYR      100
IYLPITLMKAFEARGGKIEYEAVSVEDLESLSEQYDLVVVCTGKYALGQLF      150
DTQEESPFEKQPQRALCVGLFKGIKEAPIRAVTMSFSPGNGELIEIPTLS      200
FDGMCTALVLENHIGGDLEVLANTKYDENPRAFLDLLLEKLHKHHPSVAE      250
RIDPEEFDLVNSSLDILQGAVTPVFRNGHATLKNKGKTIIGLGDVQATVDP      300
VLGQGANMASHAAWILGEEIVSNSVFDQRFCEHVERRRQDRVLCATRWTN      350
YMLSNLQALPPEFIQFIGTLSQSRAMADEFTDNFNYPYPERQWDYFSSPERI      400
MHWCAQYAPGIAA                                               413
  
```

**Figure S1.** The sequence of AnStyA.

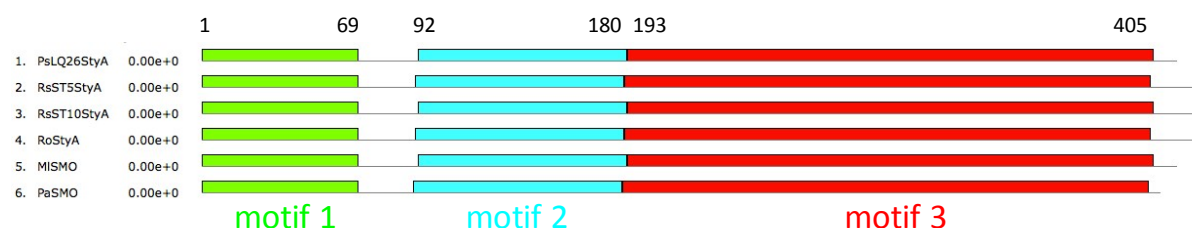

**Figure S2.** The analysis of motifs in the 6 known styrene monooxygenases. Styrene monooxygenase from *Pseudomonas* sp. LQ26 (PsLQ26StyA, GenBank: ADE62390), *Rhodococcus opacus* 1CP (RoStyA, GenBank: AII82583), *Rhodococcus* sp. ST-5 (RsST5StyA, GenBank: BAL04132), *Rhodococcus* sp. ST-10 (RsST10StyA, GenBank: BAL04129), *Paraglaciecola agarilytica* (PaStyA, GenBank: WP\_008305084.1), and *Marinobacterium litorale* (MlStyA, WP\_027855270.1).

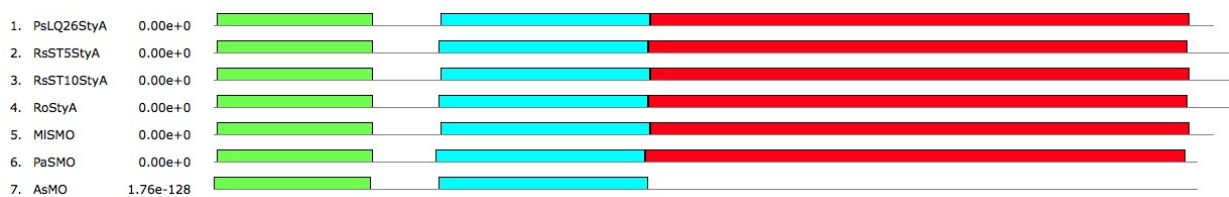

**Figure S3.** The analysis of motifs in the 6 known styrene monooxygenases and the putative monooxygenase from *A. sacchari* (AsMo, GenBank: WP\_091504755).

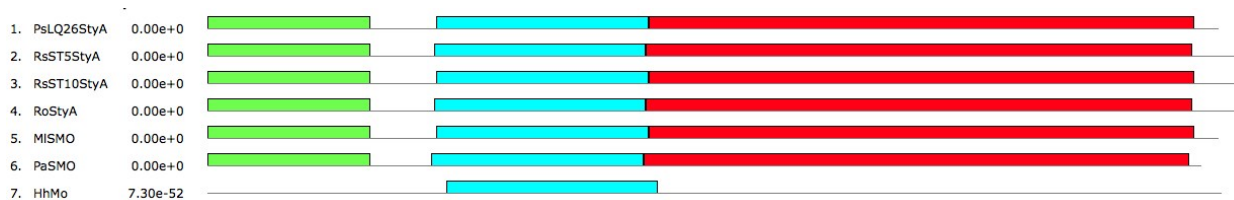

**Figure S4.** The analysis of motifs in the 6 known styrene monooxygenases and the putative alaninephosphoribitol ligase from *H. huttienne* (HhMo, GenBank: WP\_039783212).

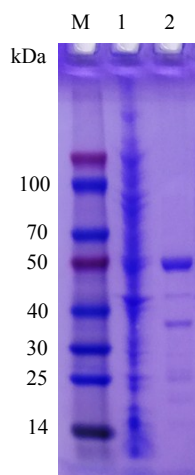

**Figure S5.** SDS-PAGE analysis of the HhMo expression and purity. Lane M: markers; Lane 1: cell-free extracts of *E. coli* harboring pET-HhMo-StyB; Lane 2: purified HhMo.

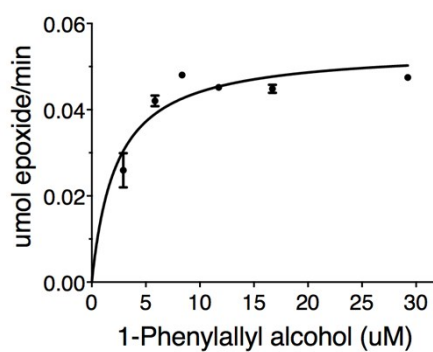

**Figure S6.** Steady-state kinetics of HhMo-catalyzed the epoxidation of 1-phenylallyl alcohol. Steady state kinetics were measured in triplicates by varying the 1-phenylallyl alcohol concentration from 3  $\mu\text{M}$  to 29  $\mu\text{M}$  and fitting the data to the Michaelis-Menten equation. Errors limits are standard deviations.

## 6. Selected $^1\text{H}$ NMR spectra and HPLC chromatograms

### (*S*)-2-benzyloxirane (**1b**)

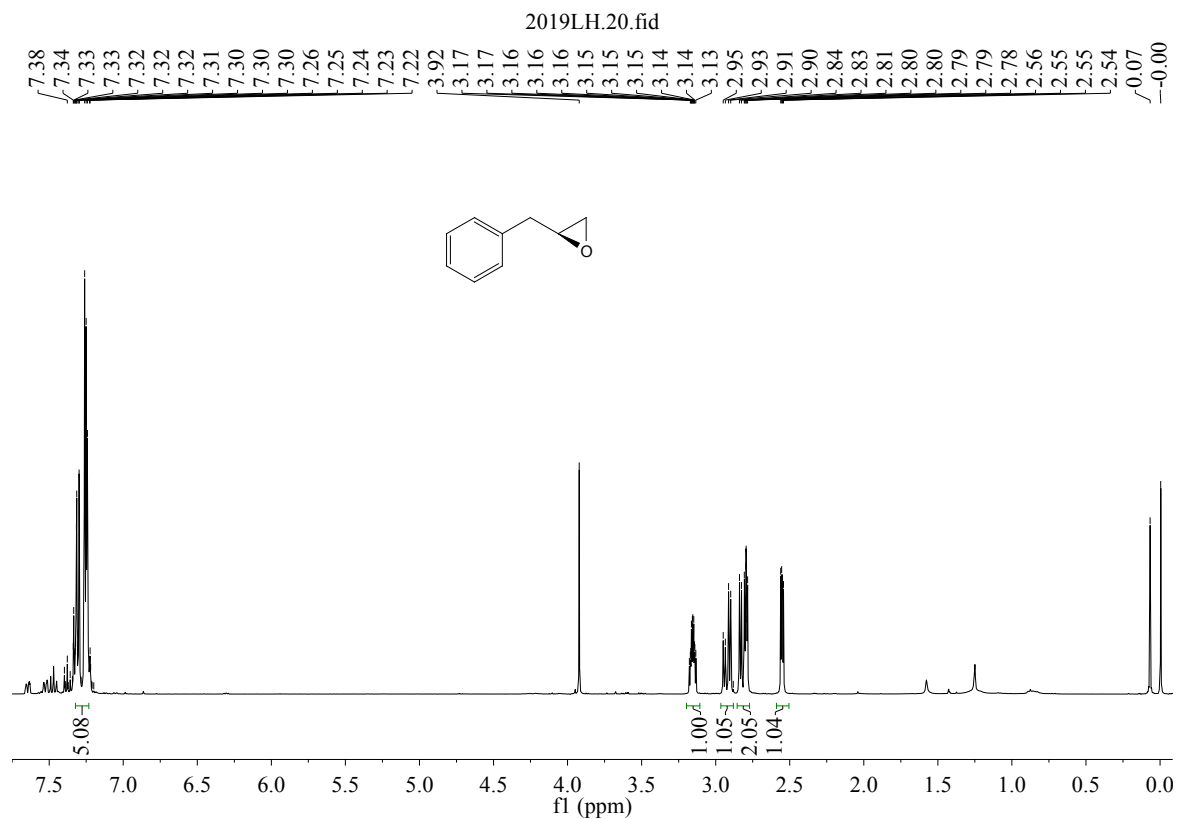

### (*S*)-2-benzyloxirane (**1b**)

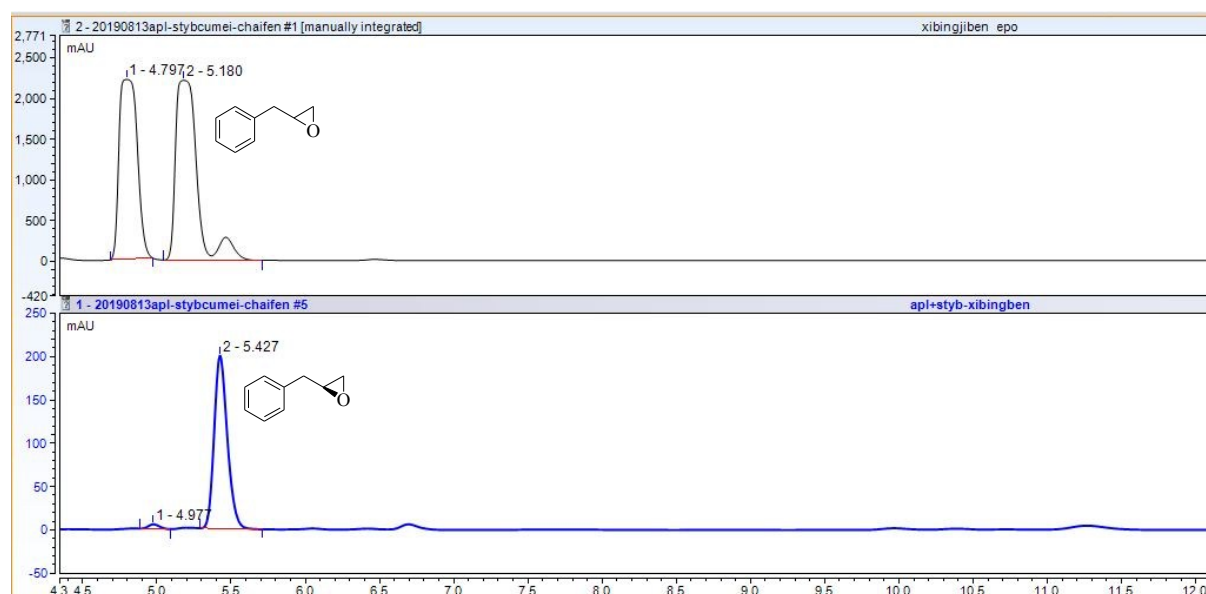

(S)-2-(3-fluorobenzyl)oxirane (**2b**)

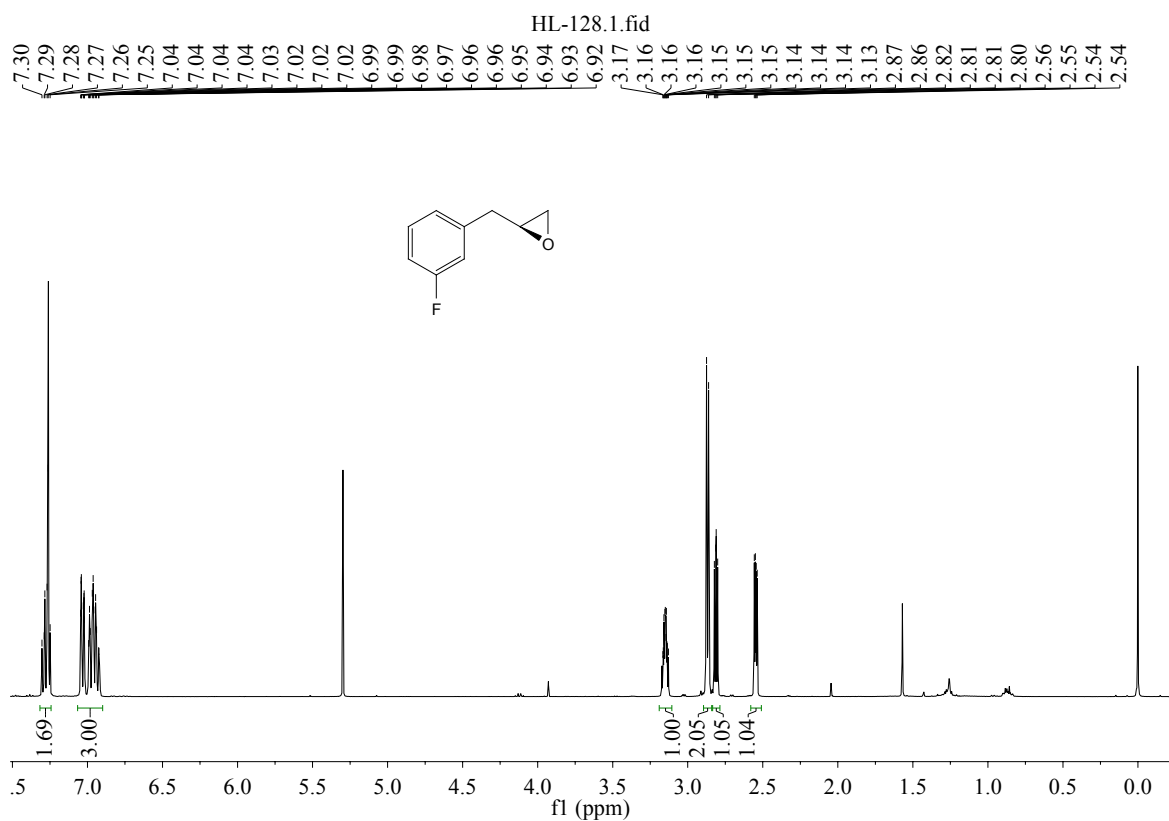

(S)-2-(3-fluorobenzyl)oxirane (**2b**)

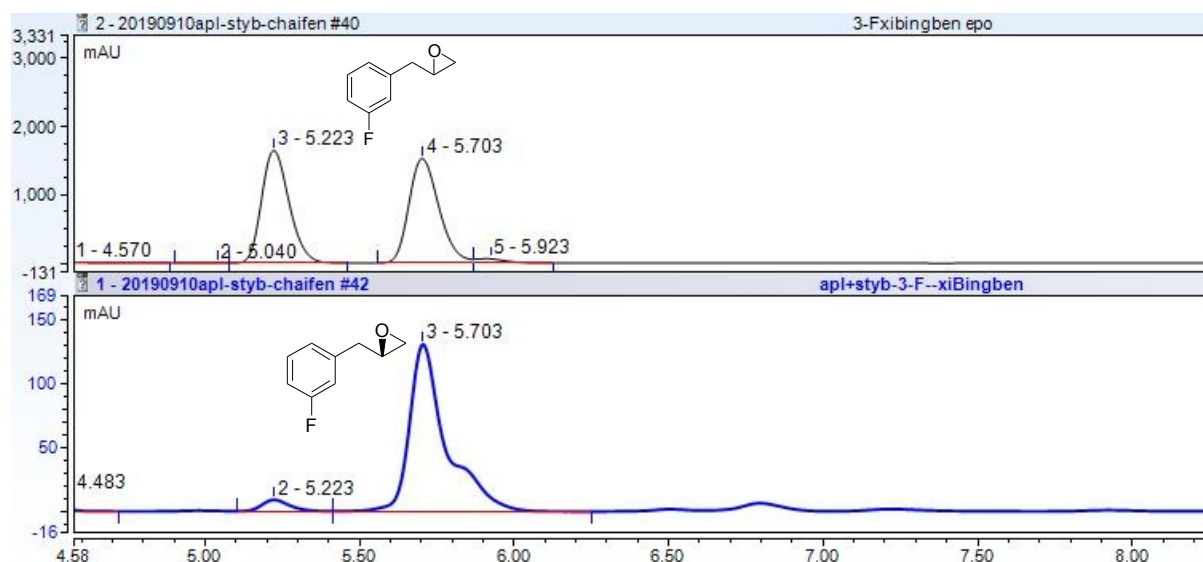

(S)-2-(4-fluorobenzyl)oxirane (**3b**)

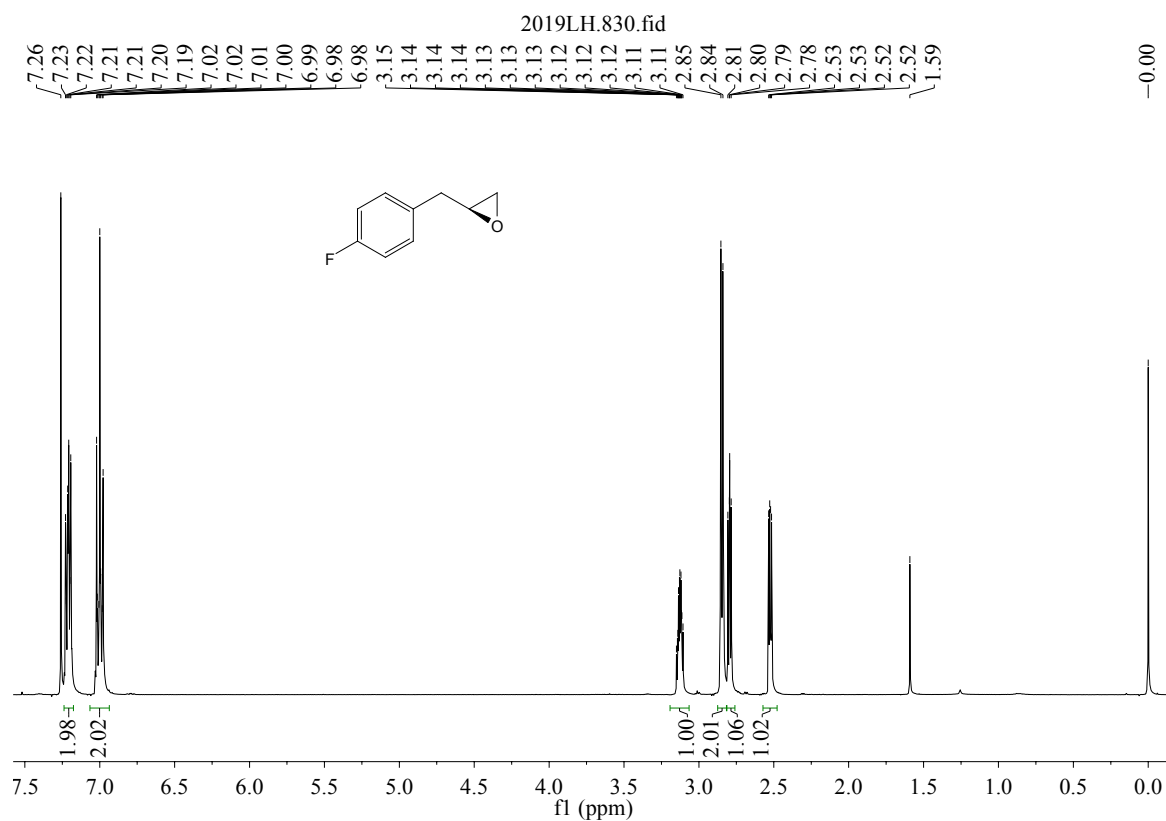

(S)-2-(4-fluorobenzyl)oxirane (**3b**)

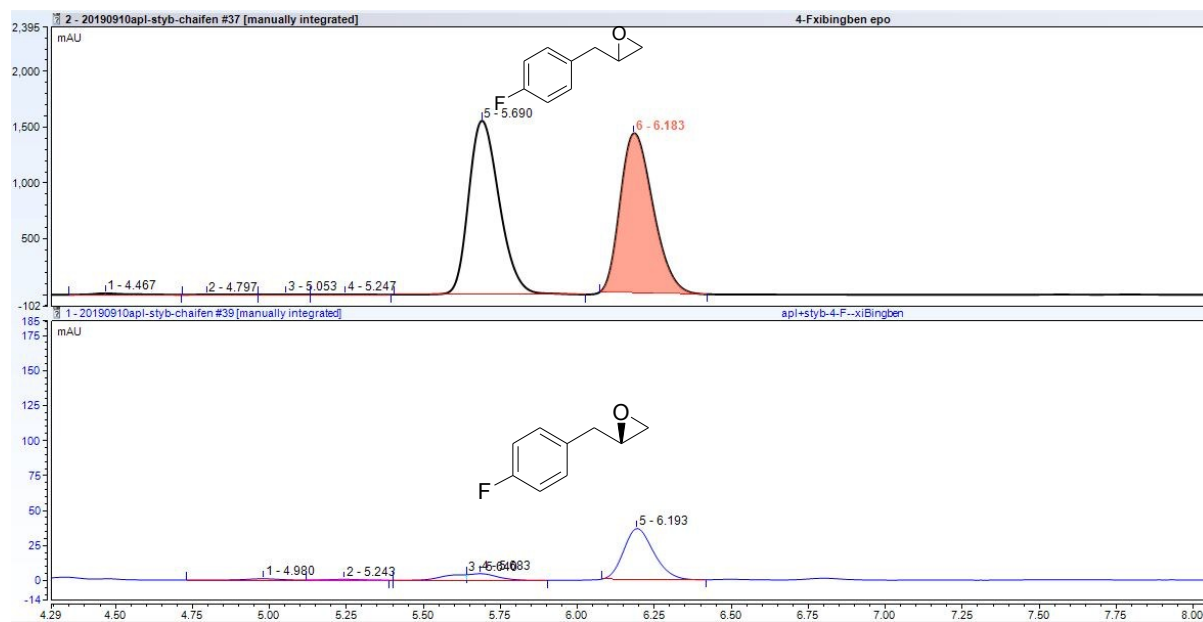

(S)-2-(2-methylbenzyl)oxirane (**4b**)

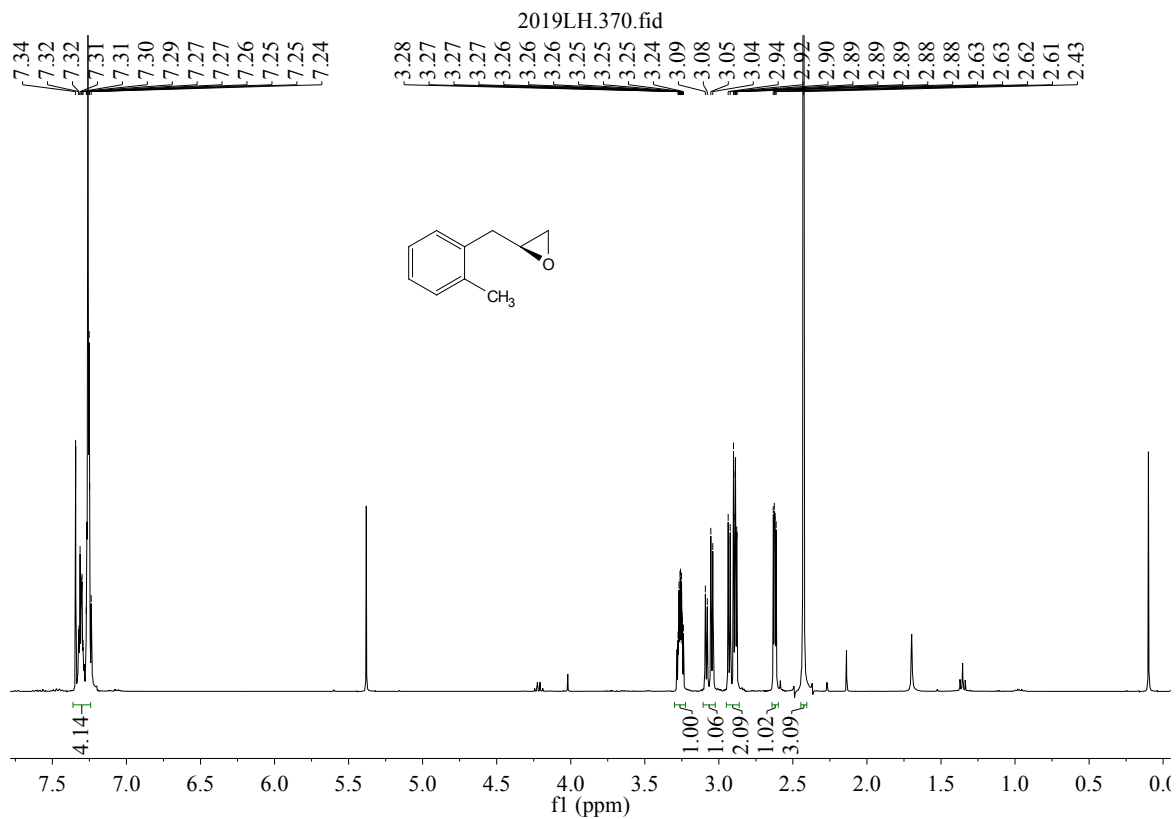

(S)-2-(3-methylbenzyl)oxirane (**5b**)

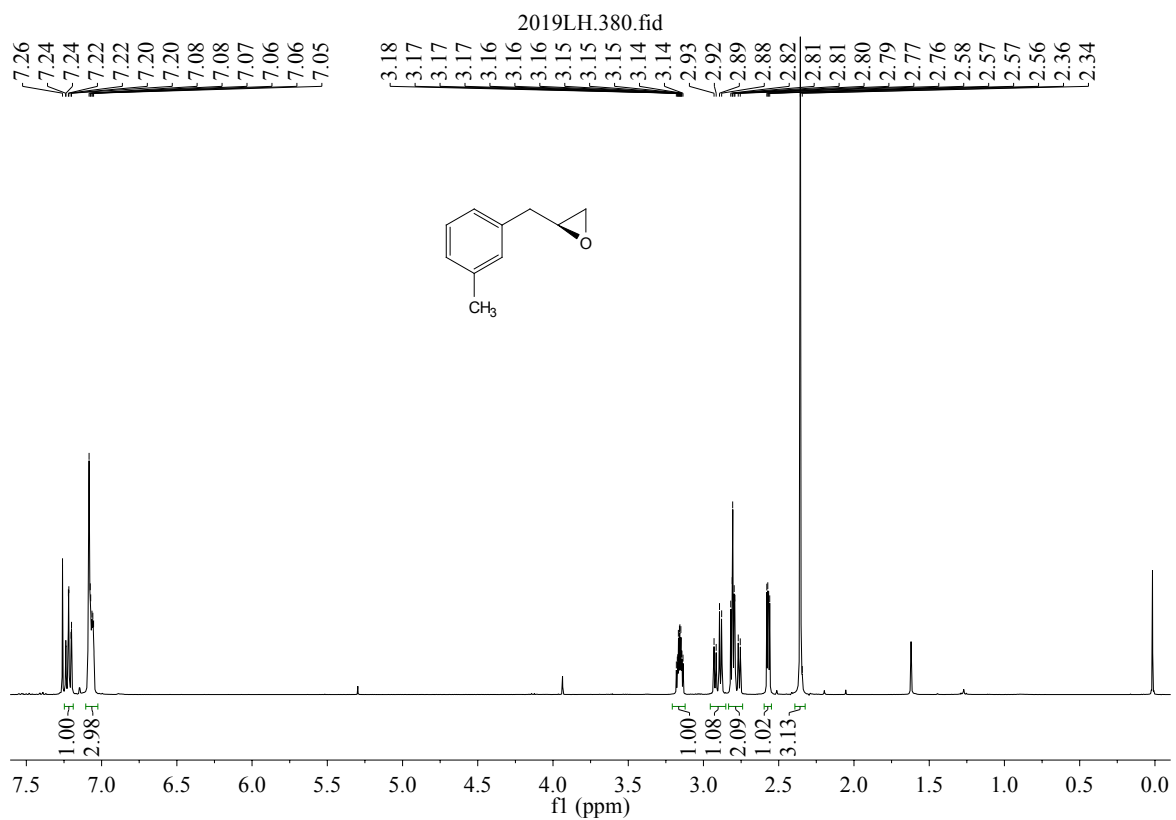

(S)-2-(3-methylbenzyl)oxirane (**5b**)

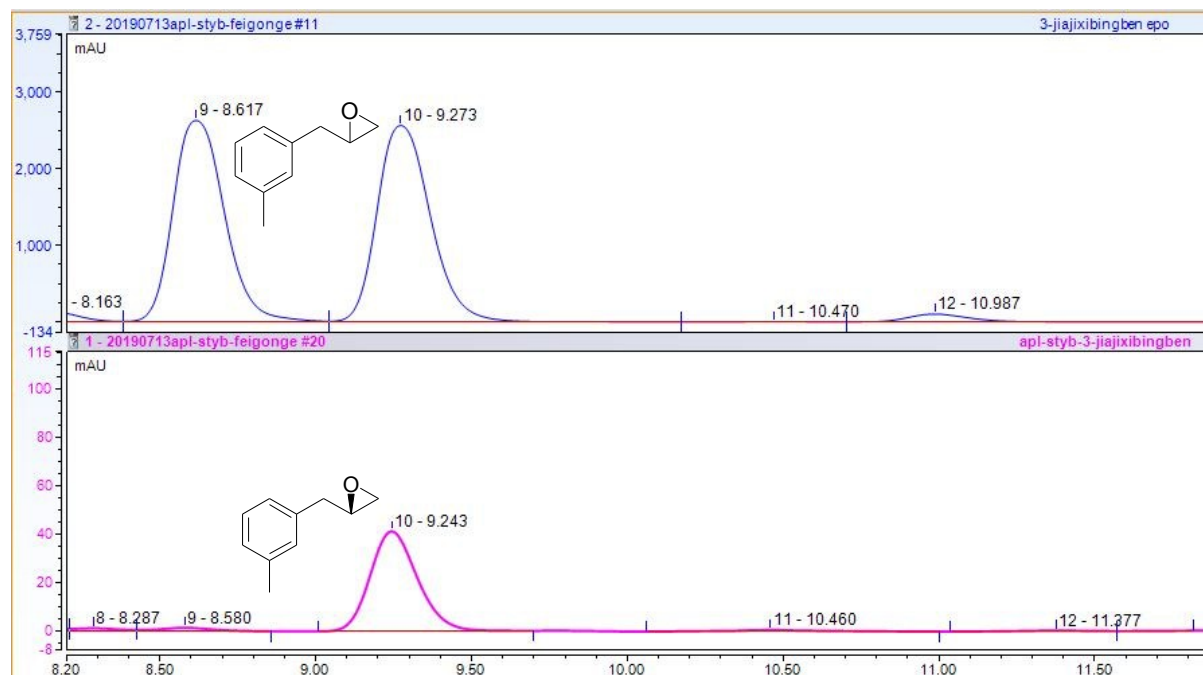

(S)-2-(4-methylbenzyl)oxirane (**6b**)

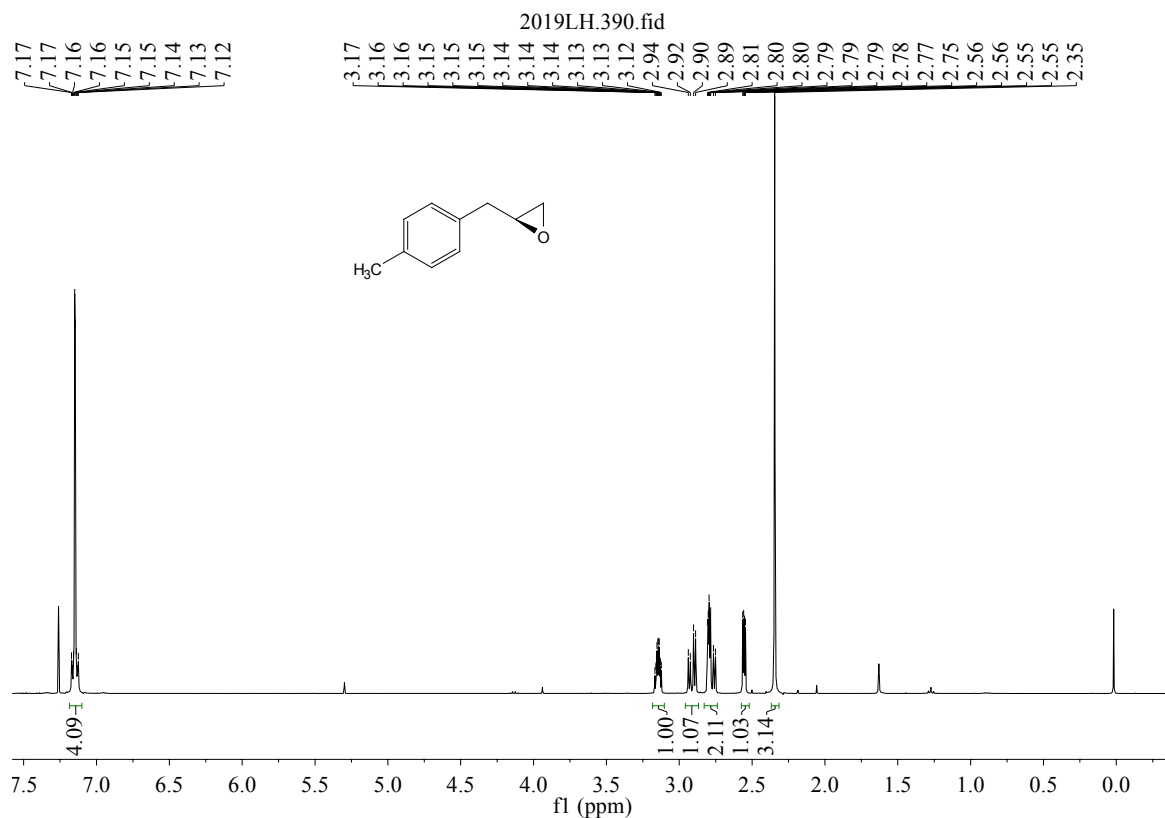



(S)-2-(4-methylbenzyl)oxirane (**6b**)

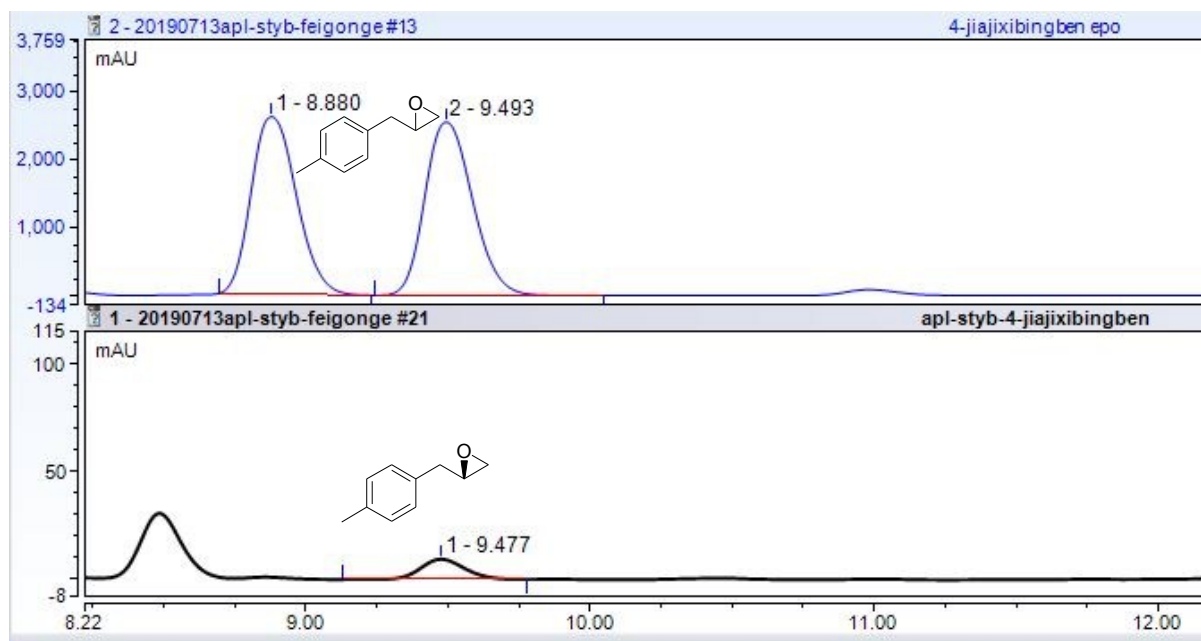

(S)-2-(3-methoxybenzyl)oxirane (**7b**)

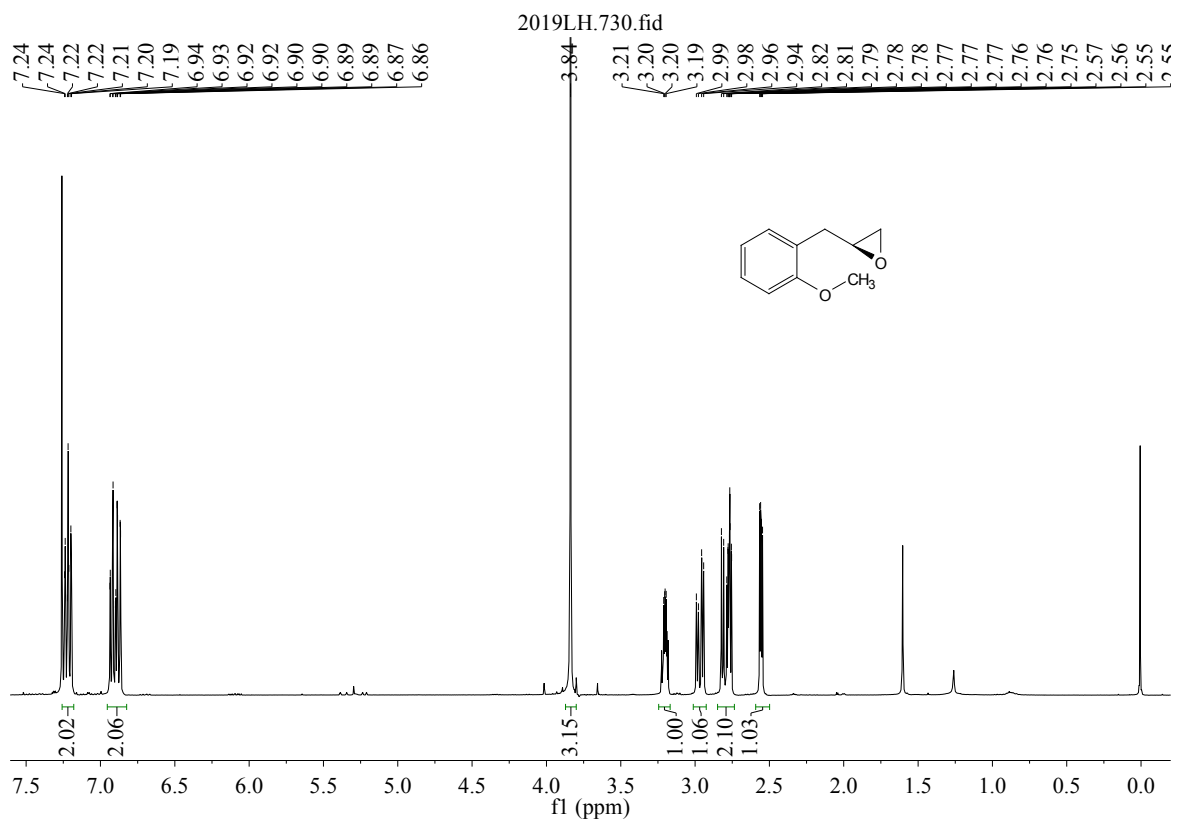

(S)-2-(4-methoxybenzyl)oxirane (**8b**)

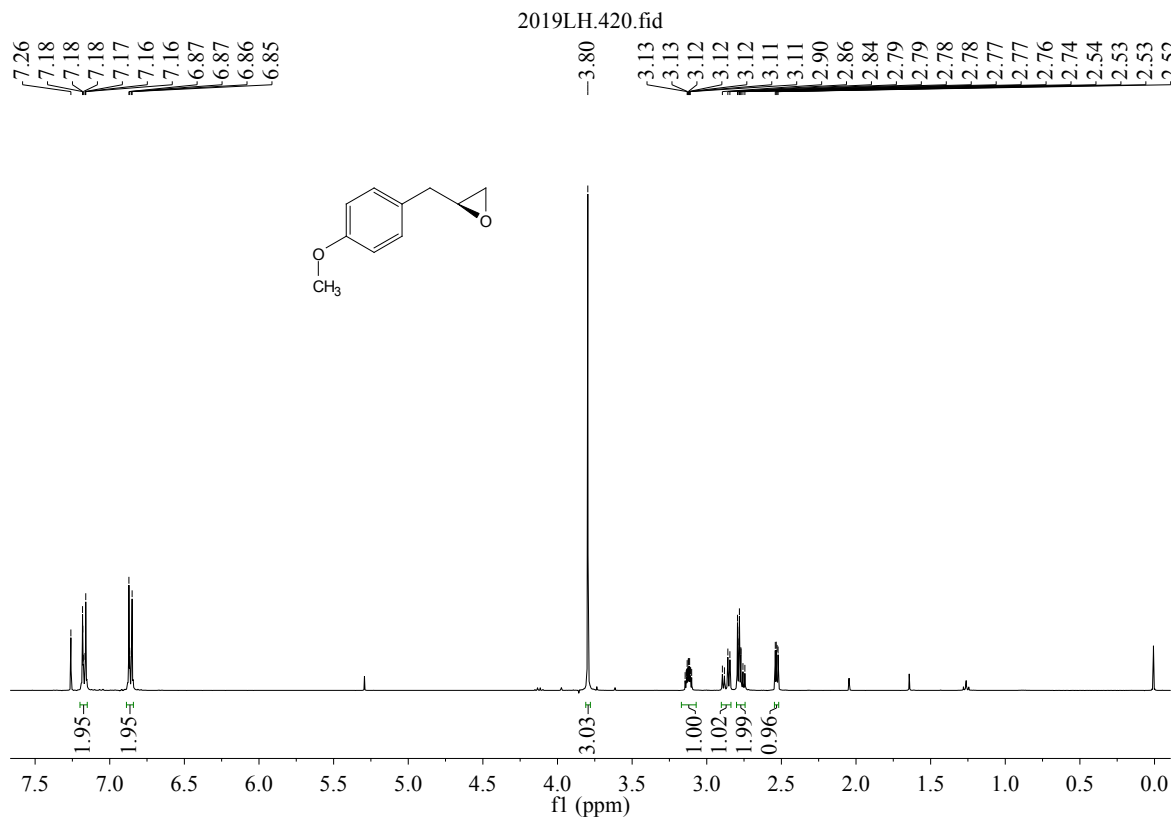

(S)-2-(3-methoxybenzyl)oxirane (**9b**)

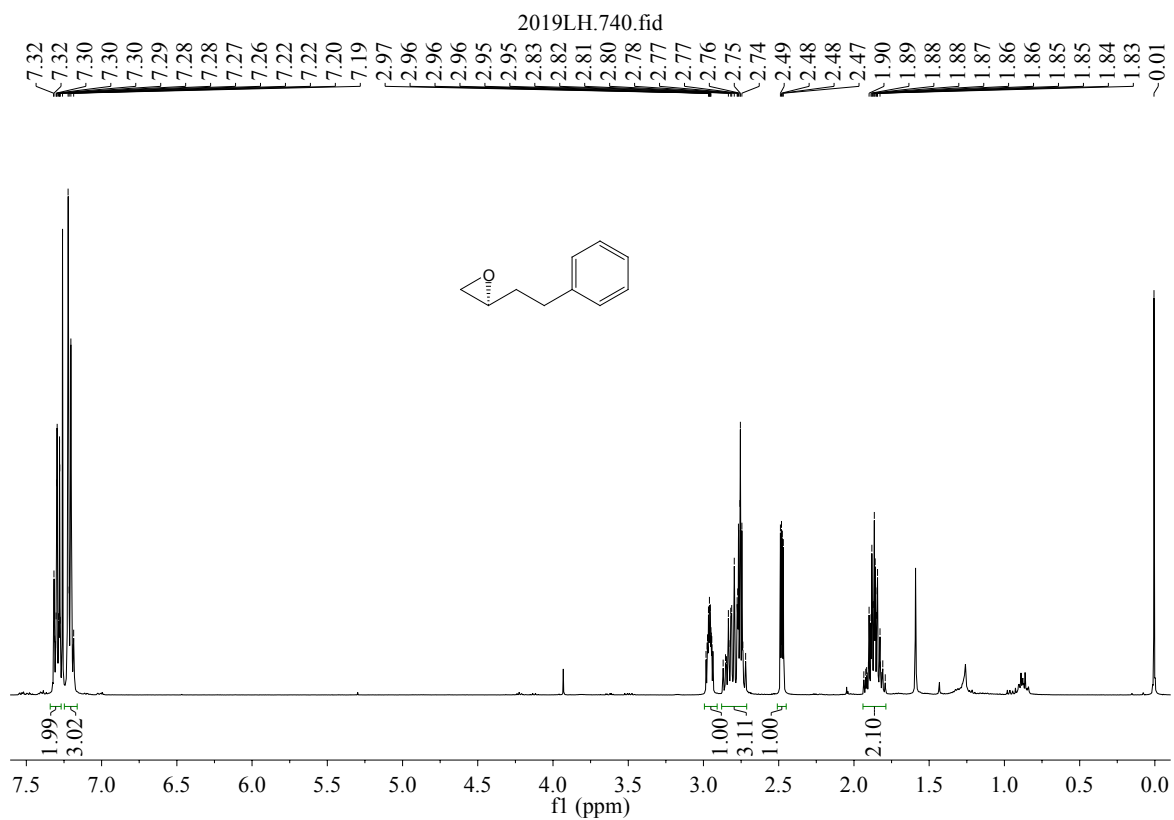

(S)-2-(3-methoxybenzyl)oxirane (**9b**)

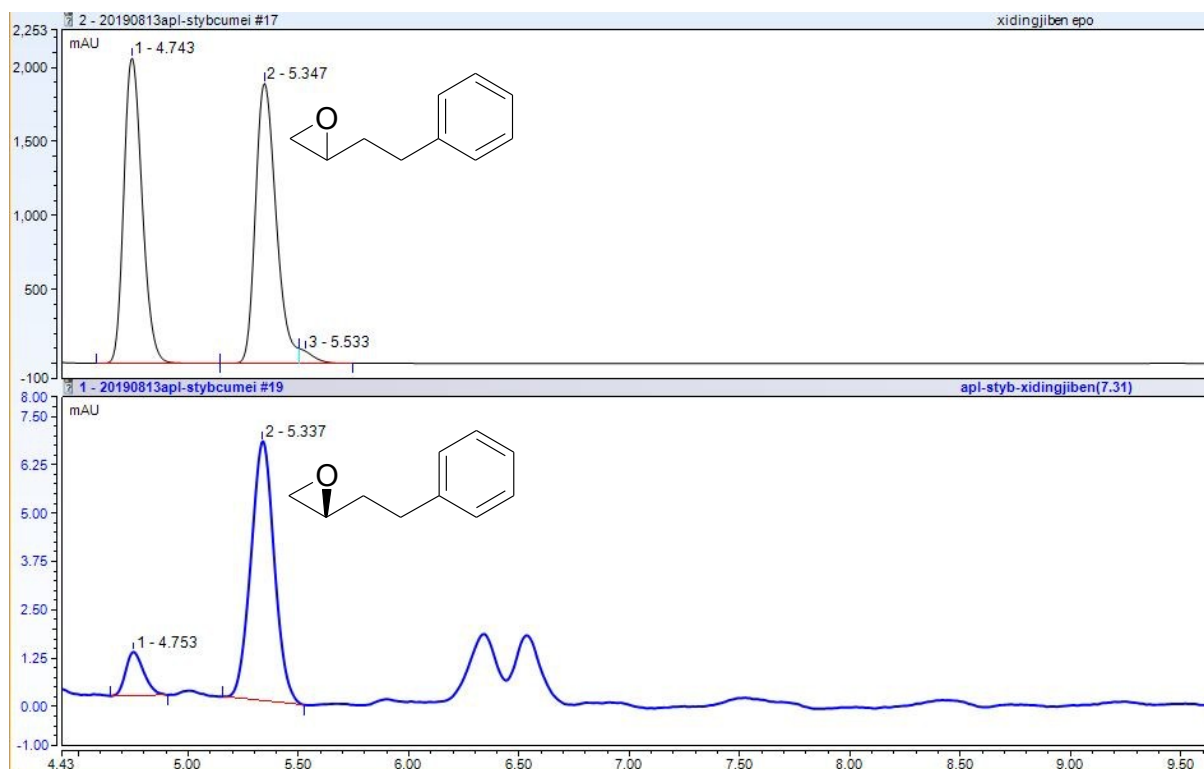

(S)-2-(phenoxy)methyl oxirane (**10b**)

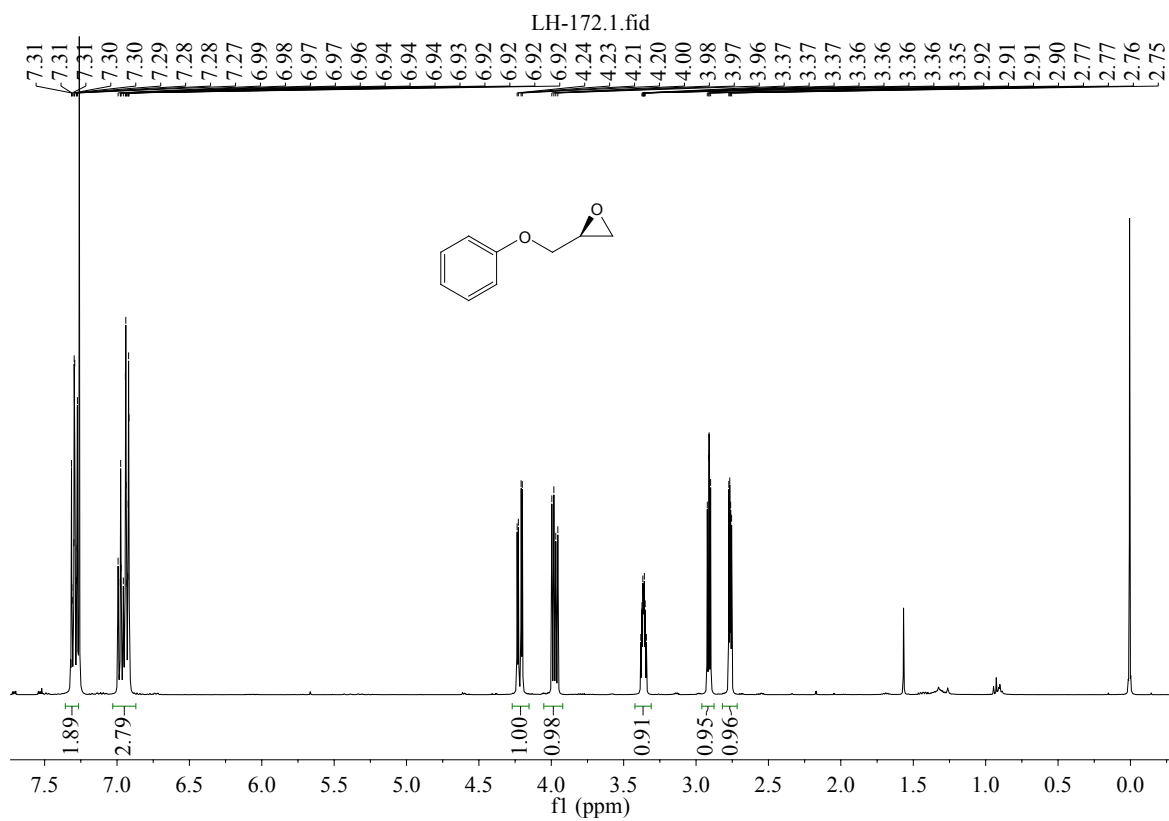

### 1-phenylprop-2-en-1-ol (**13a**)

<sup>1</sup>H NMR (400 MHz, CDCl<sub>3</sub>) δ 7.26.

2019LH.110.fid

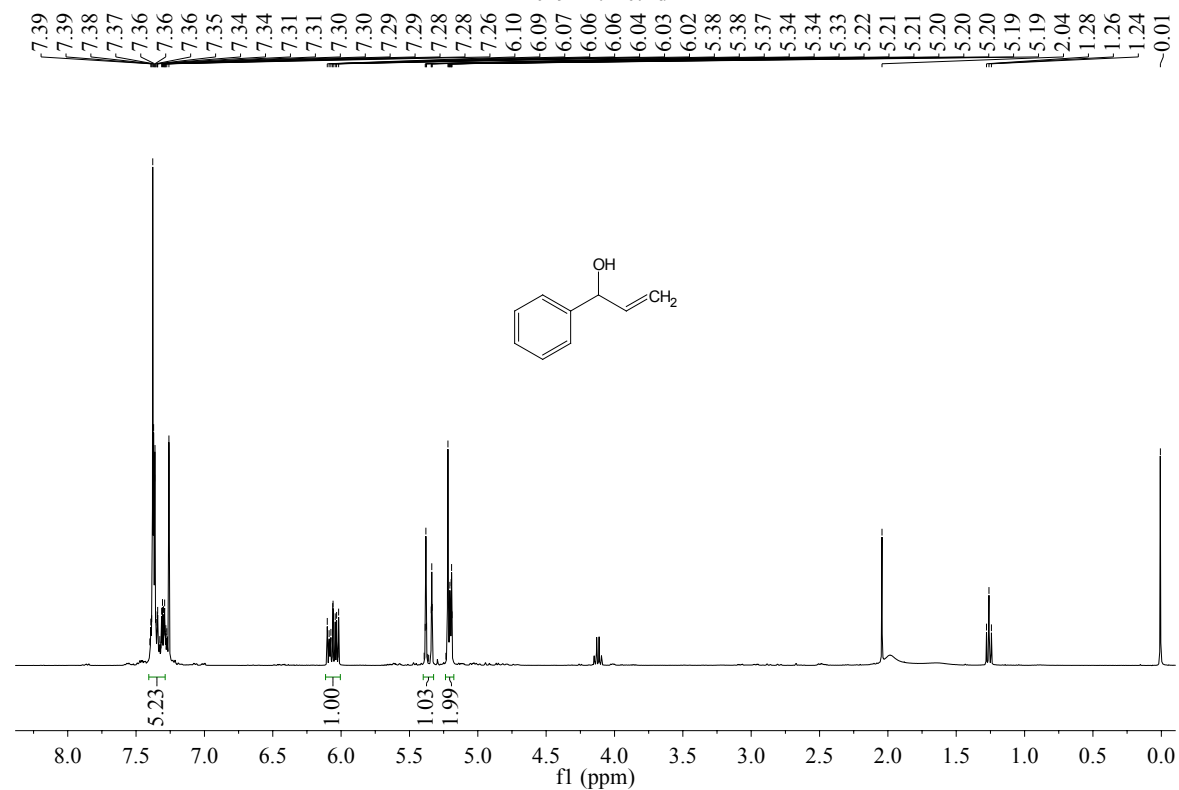

### ((R)-oxiran-2-yl)(phenyl)methanol (**13b**)

2019LH.650.fid

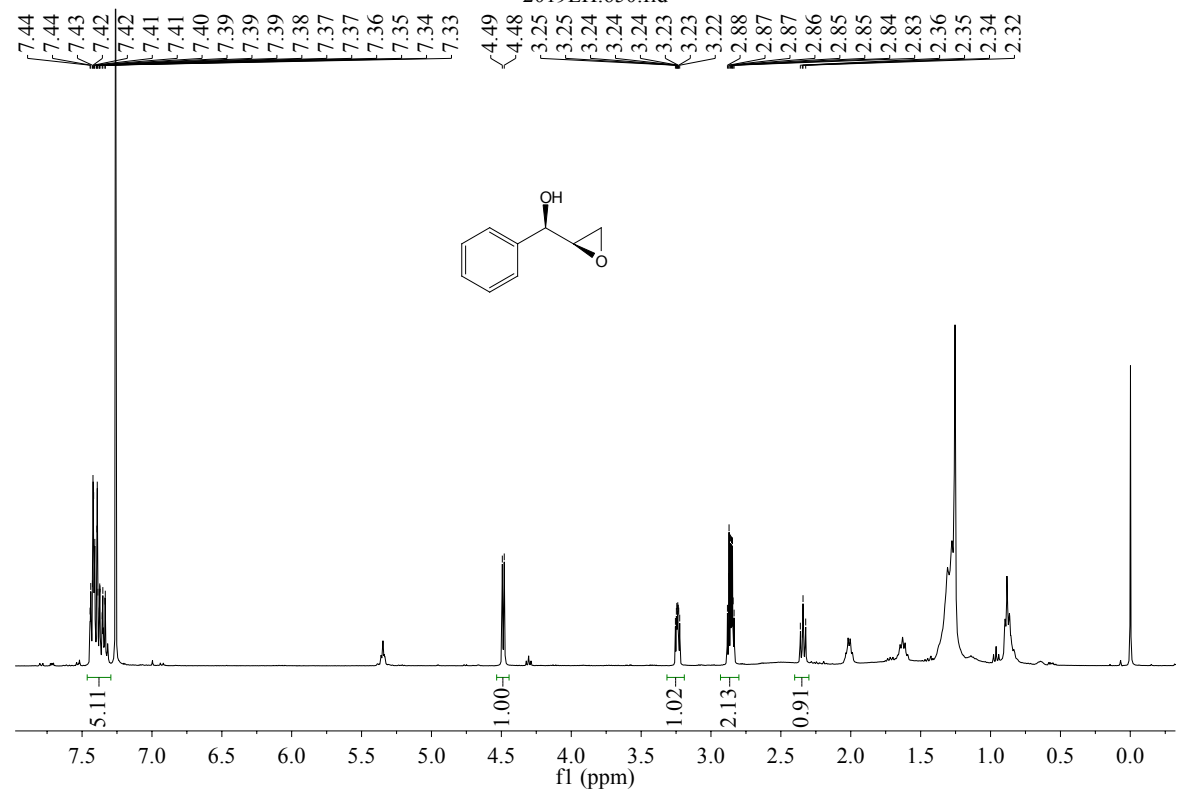

oxiran-2-yl(phenyl)methanol

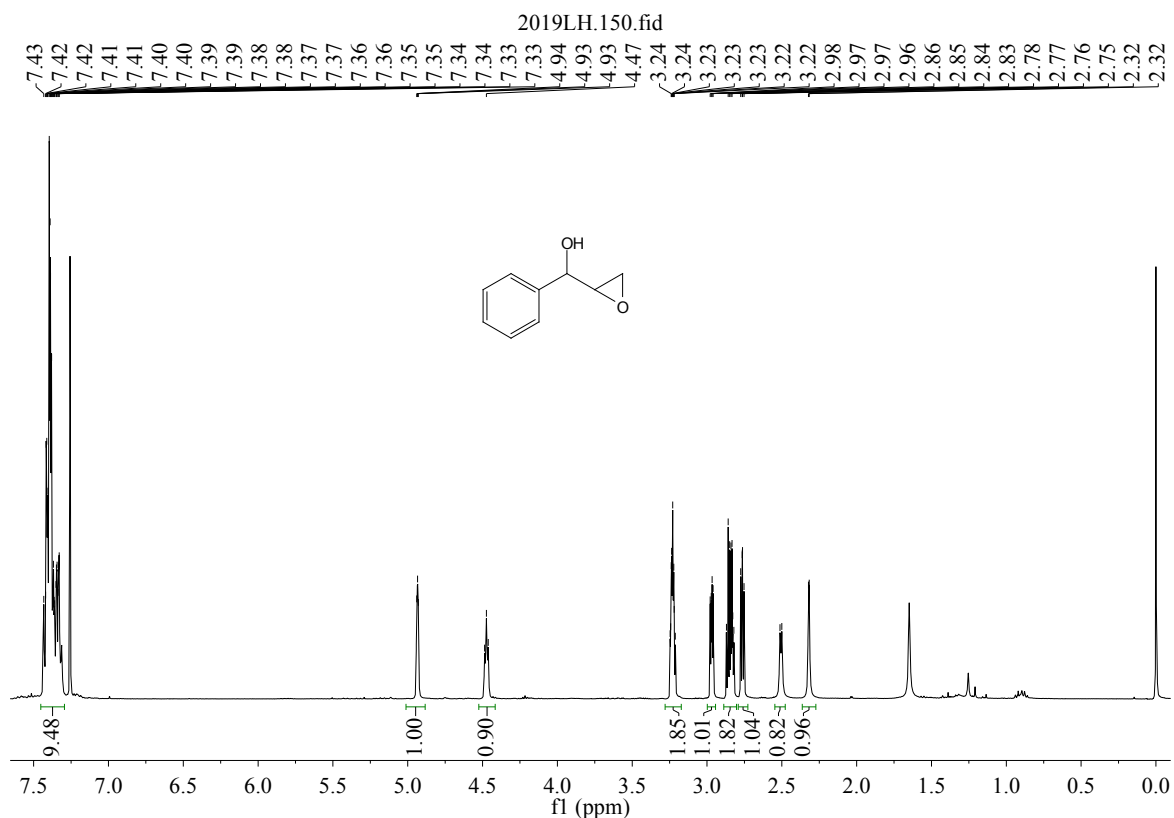

((R)-oxiran-2-yl)(phenyl)methanol (**13b**)

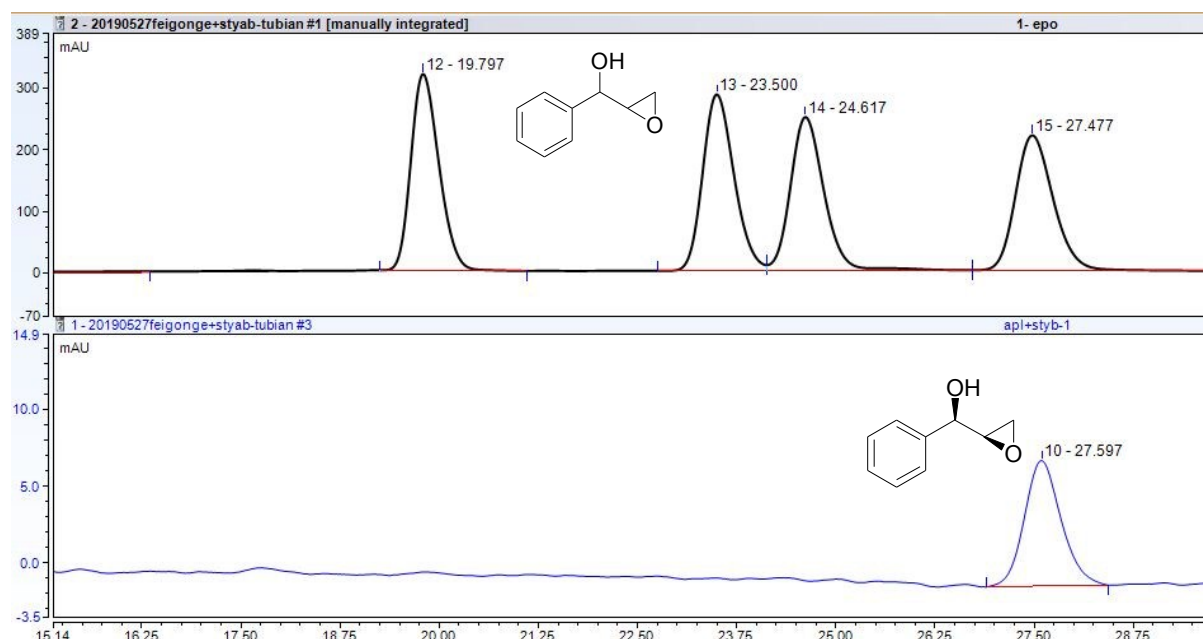

1-(3-fluorophenyl)prop-2-en-1-ol (**14a**)

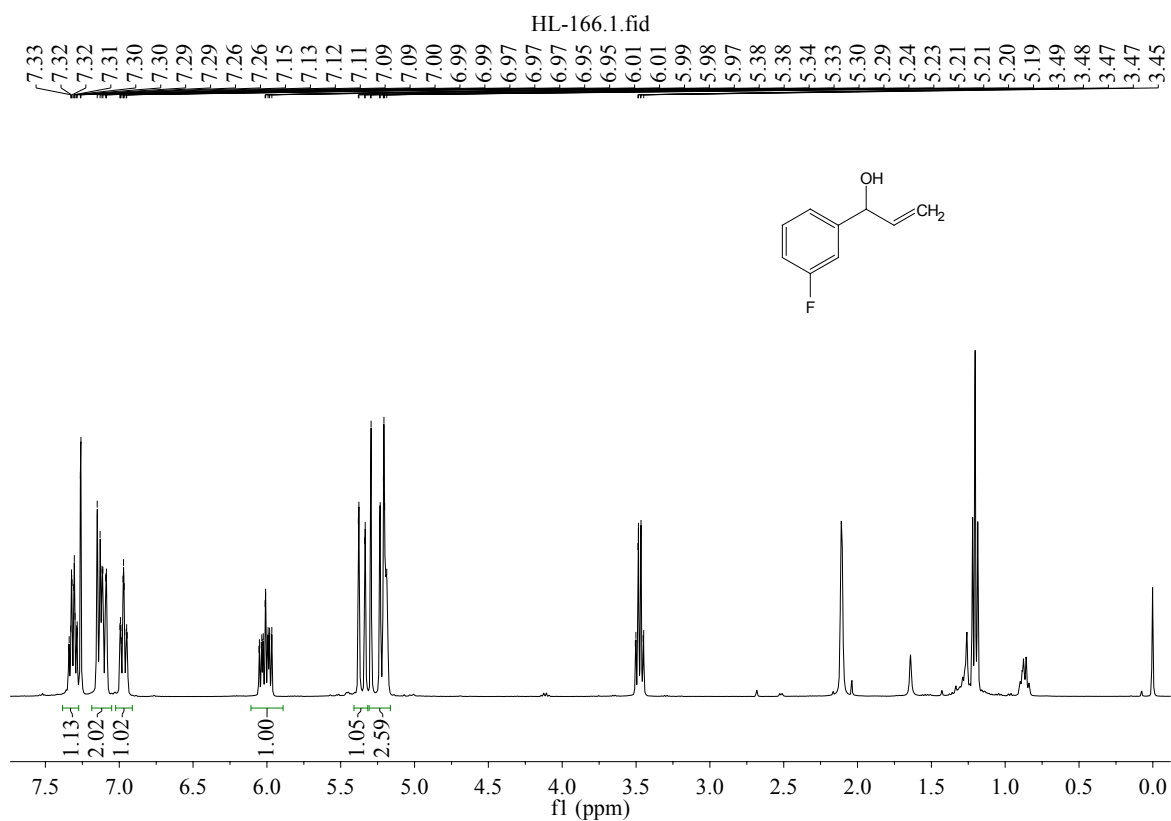

(*R*)-(3-fluorophenyl)((*R*)-oxiran-2-yl)methanol (**14b**)

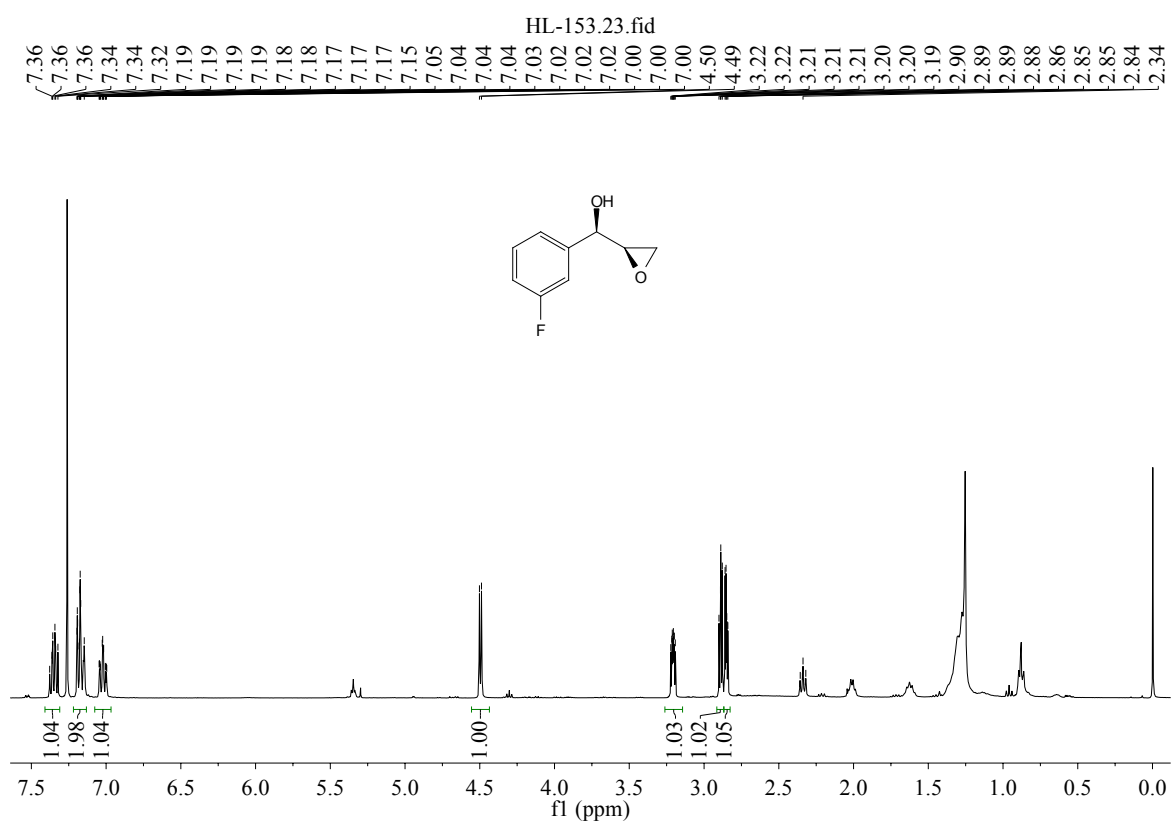

(3-fluorophenyl)(oxiran-2-yl)methanol

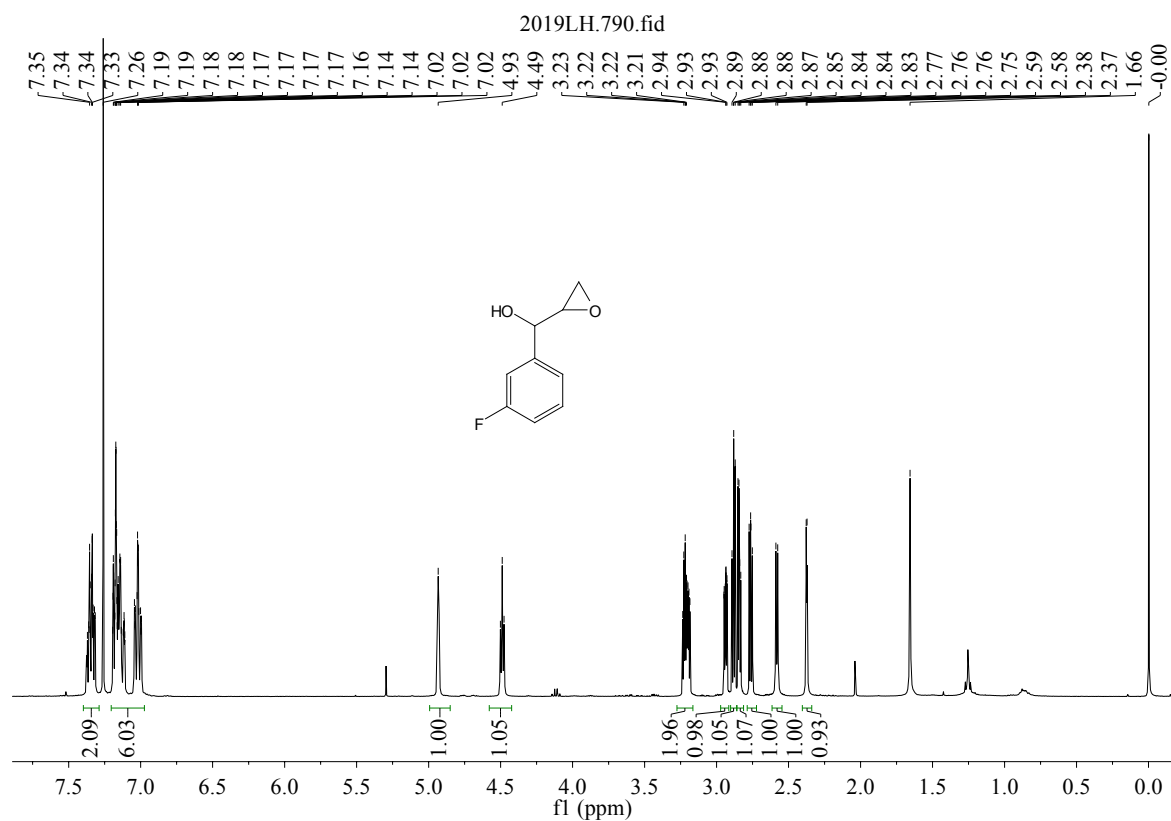

(*R*)-(3-fluorophenyl)(*R*)-oxiran-2-yl)methanol (**14b**)

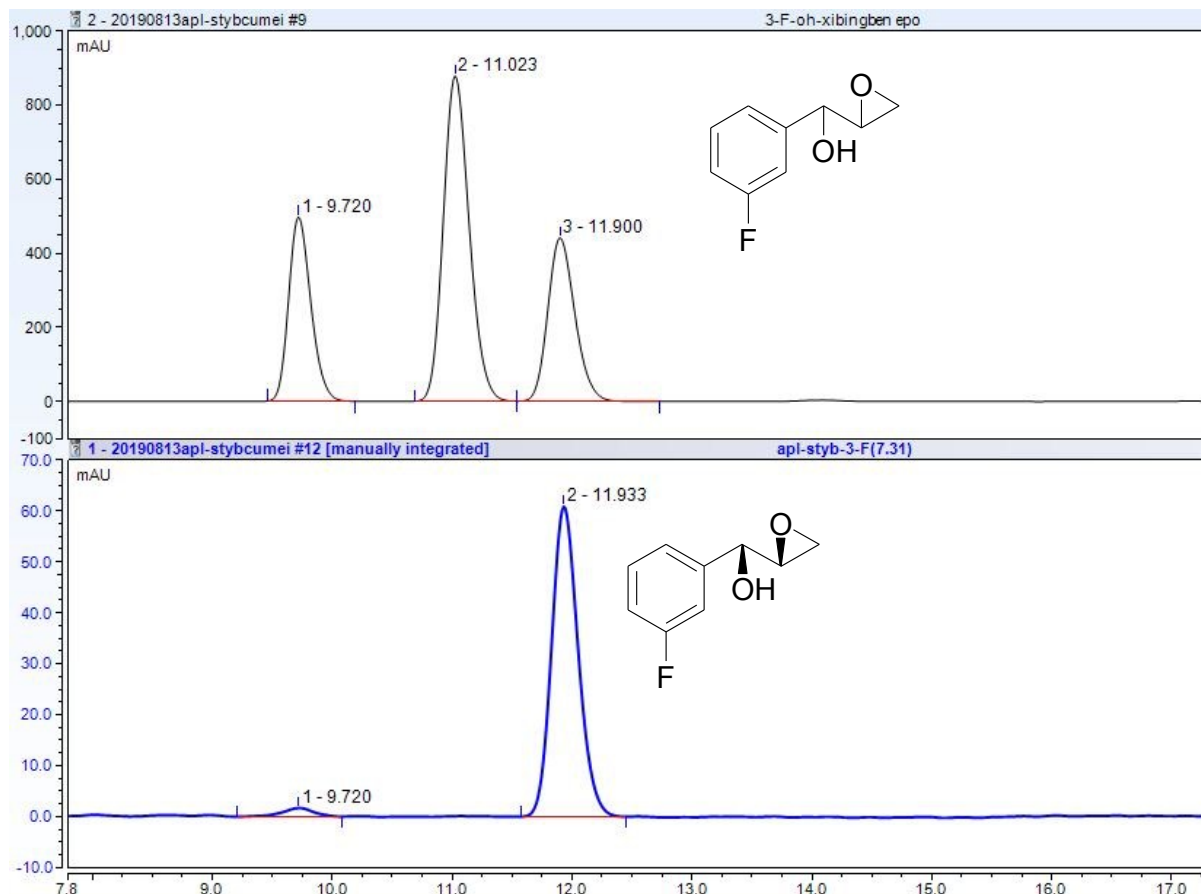

1-(4-fluorophenyl)prop-2-en-1-ol (**15a**)

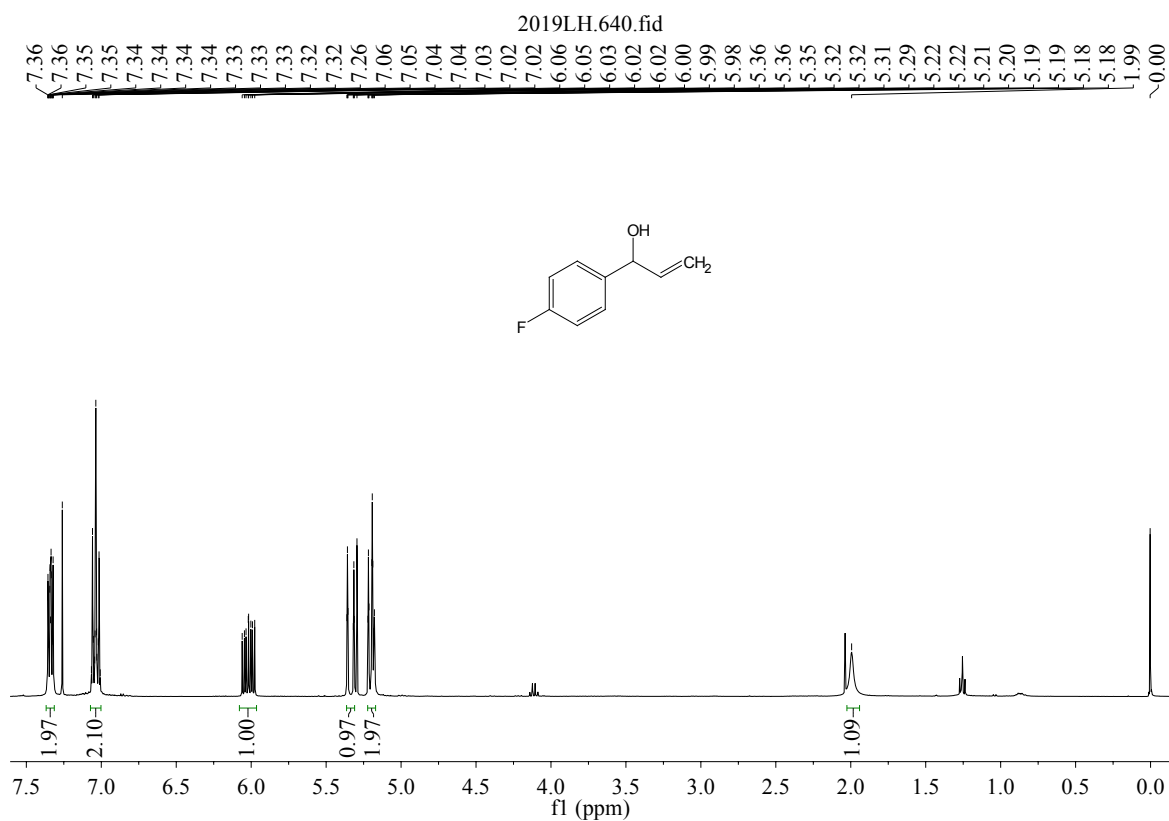

(*R*)-(4-fluorophenyl)((*R*)-oxiran-2-yl)methanol (**15b**)

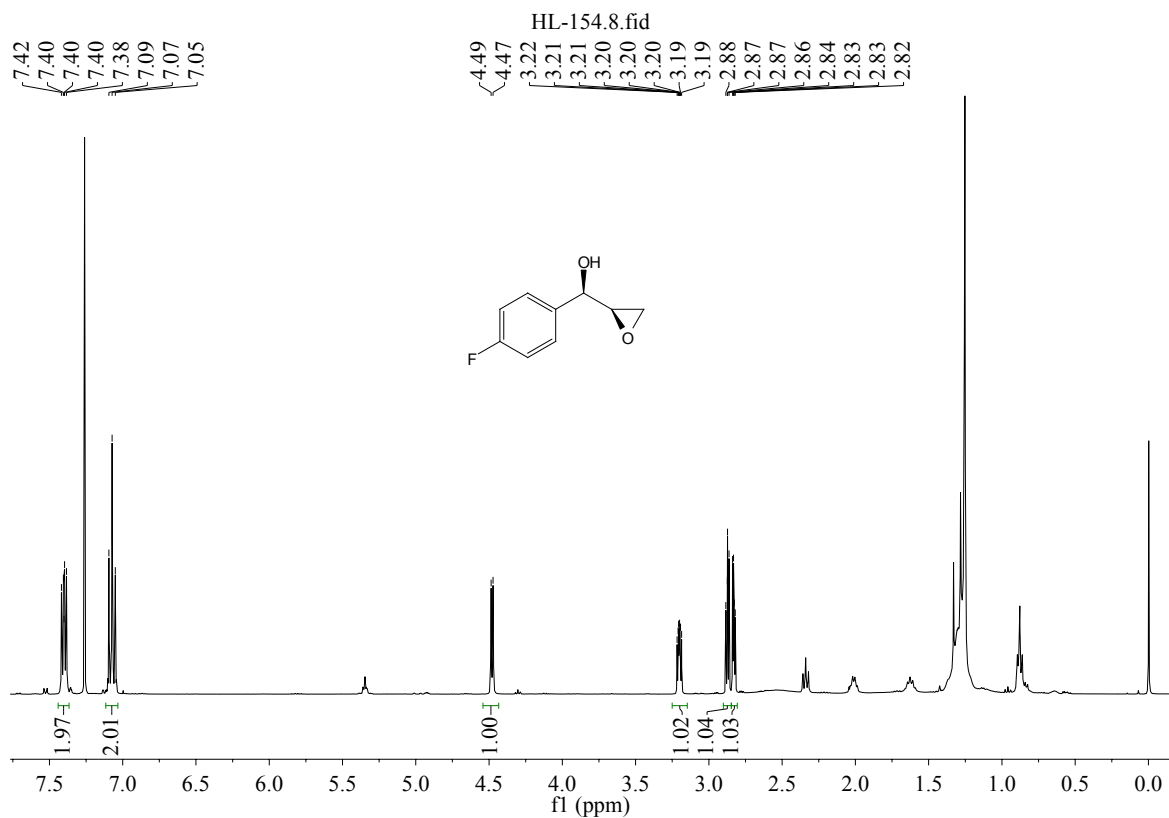



(4-fluorophenyl)(oxiran-2-yl)methanol

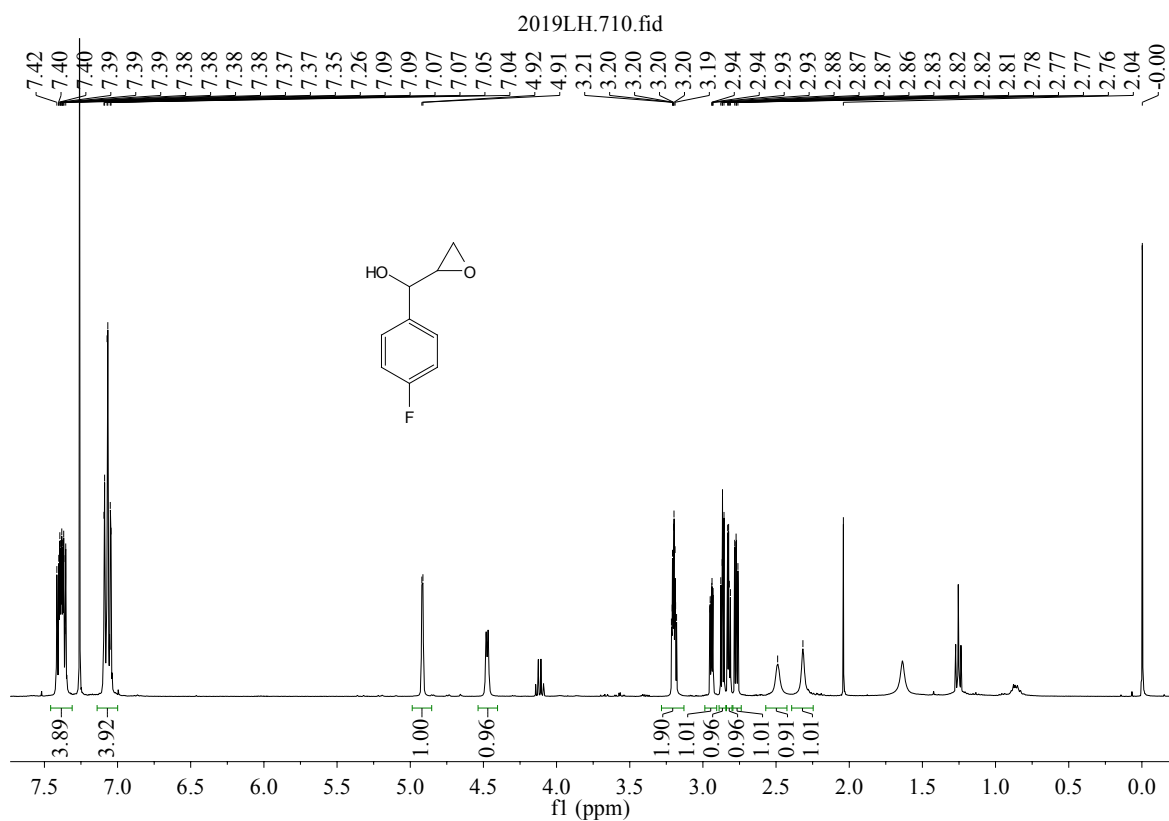

(*R*)-(4-fluorophenyl)((*R*)-oxiran-2-yl)methanol (**15b**)

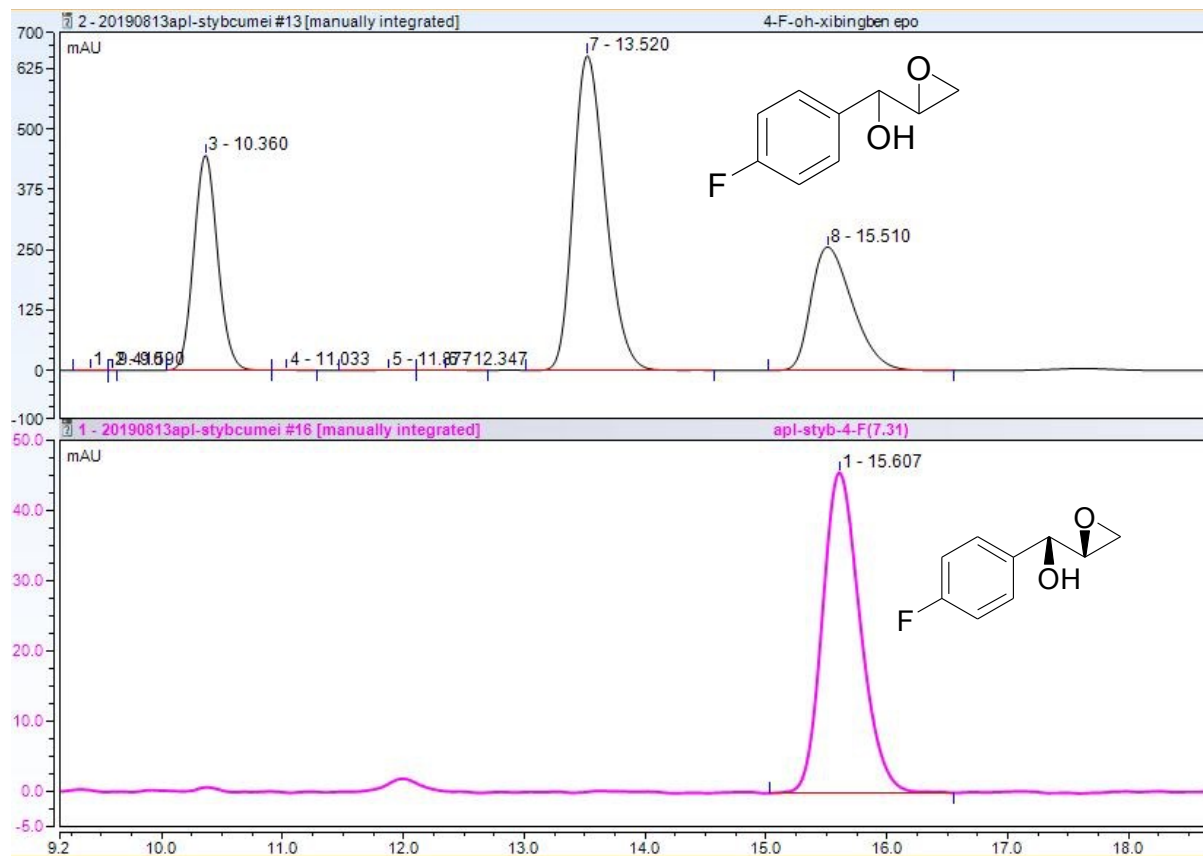

1-(naphthalen-1-yl)prop-2-en-1-ol (**16a**)

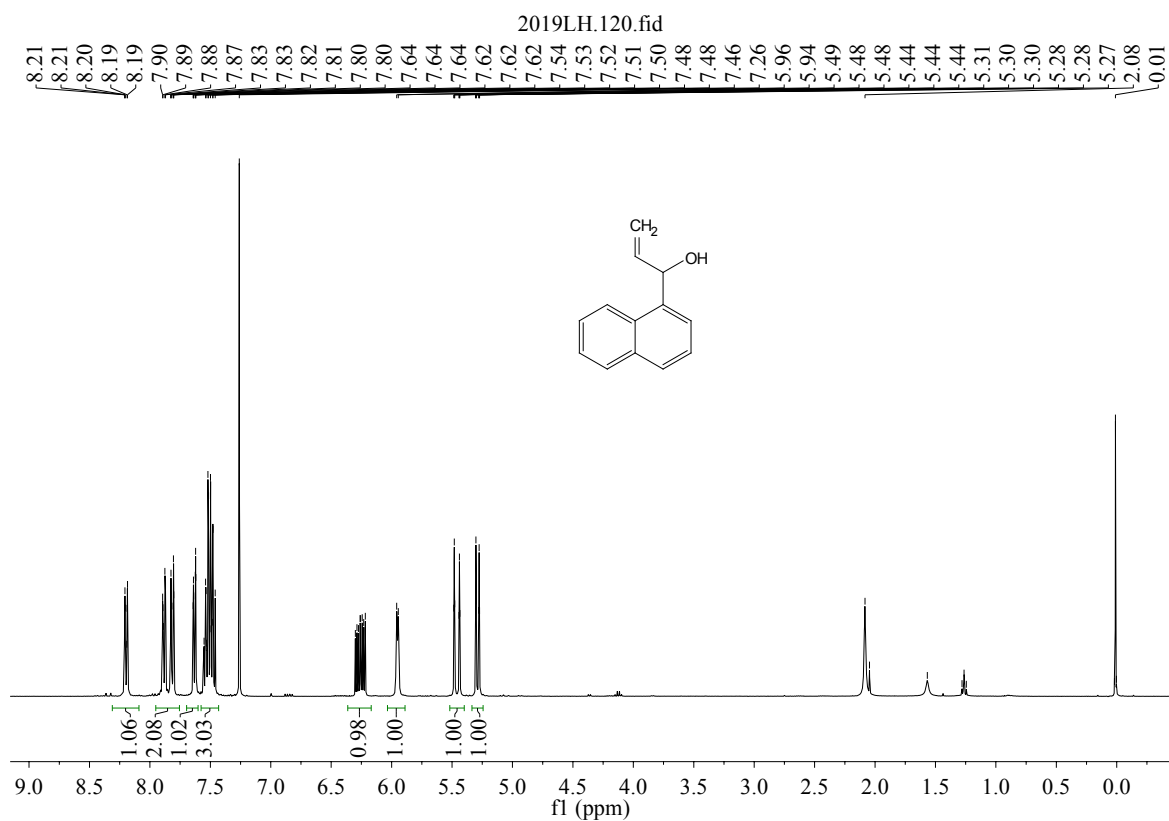

naphthalen-1-yl(oxiran-2-yl)methanol

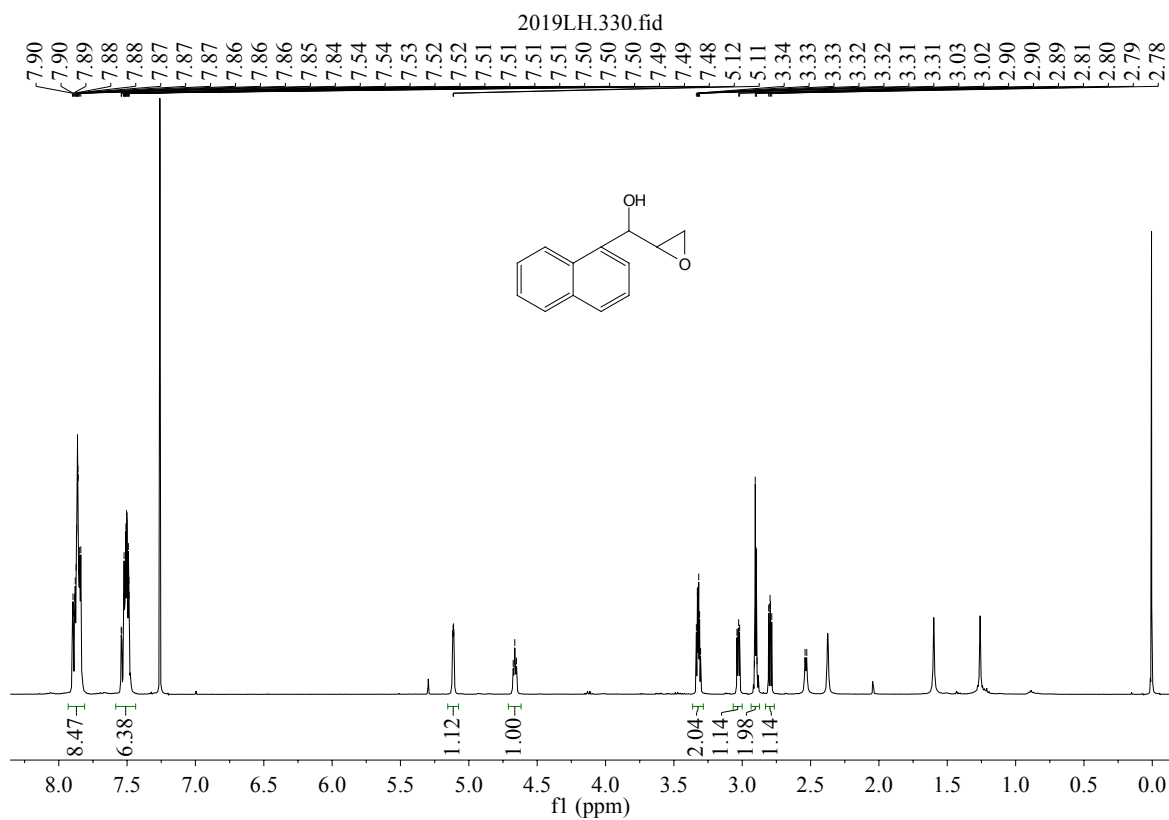

naphthalen-2-yl(oxiran-2-yl)methanol (**17a**)

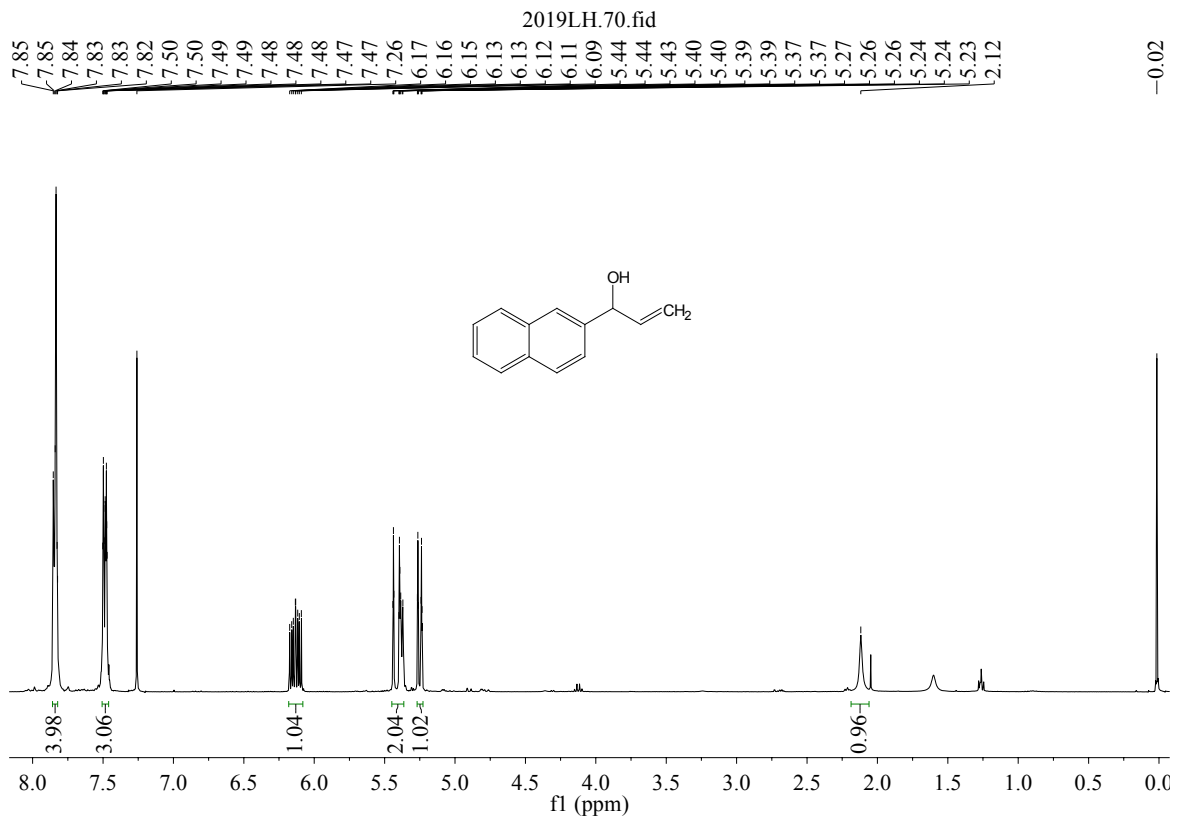

naphthalen-2-yl(oxiran-2-yl)methanol

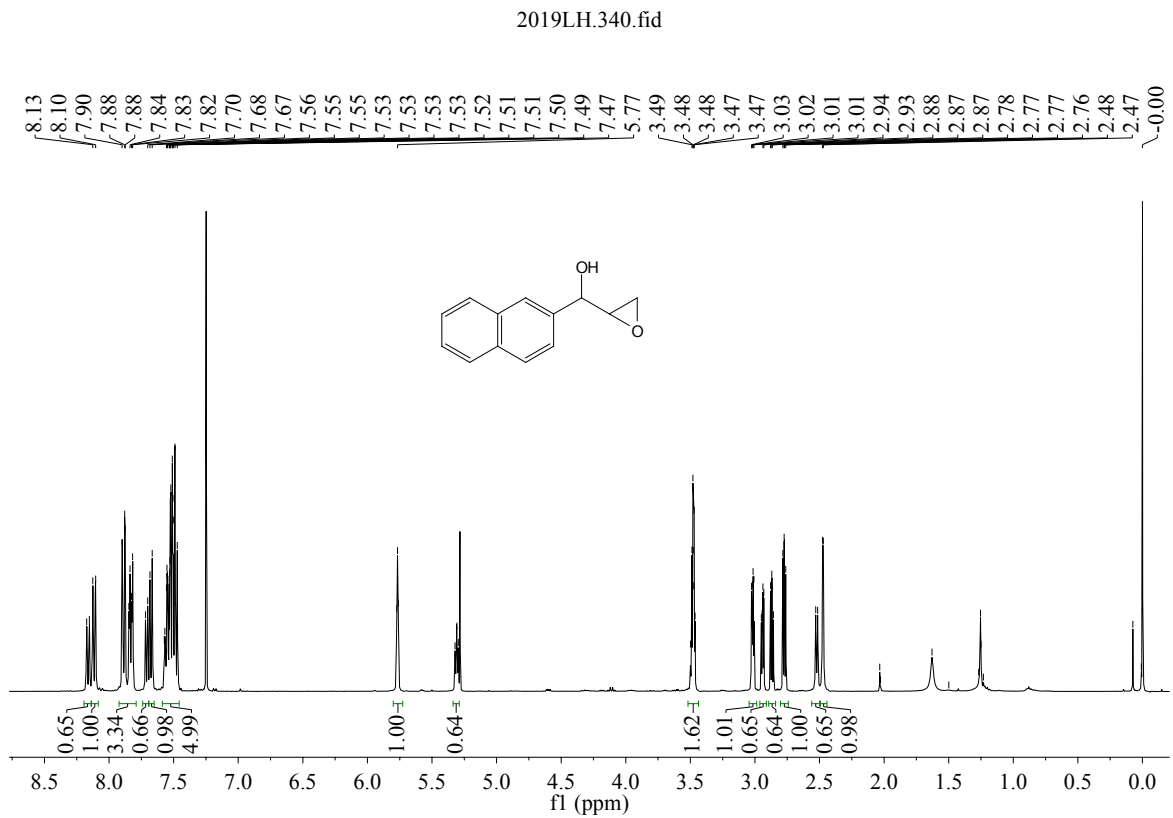

(*R,R*)-naphthalen-2-yl(oxiran-2-yl)methanol (**17b**)

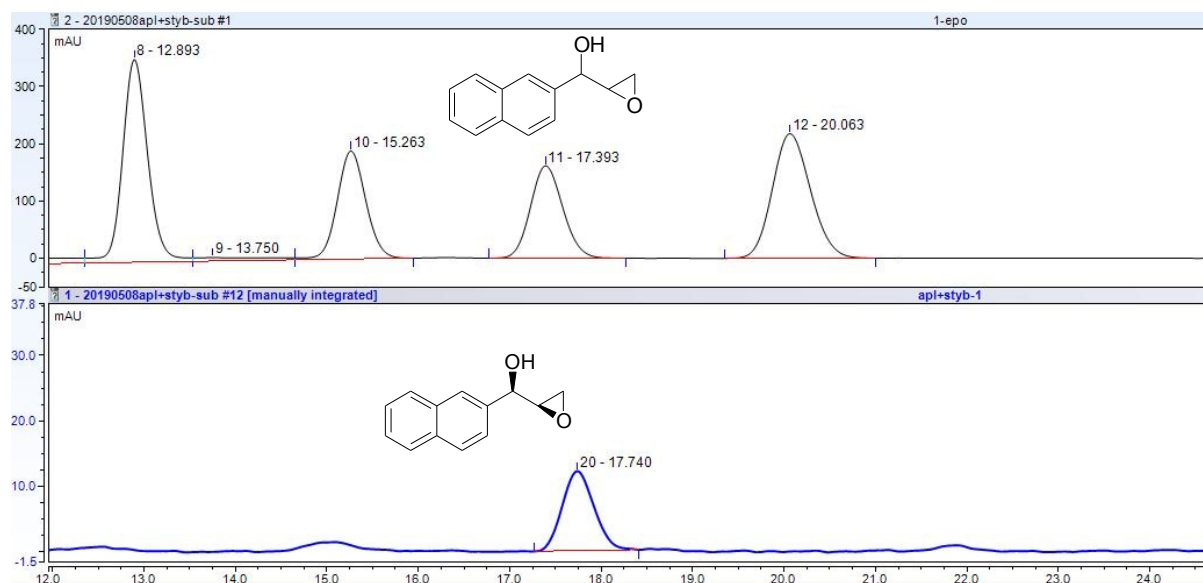

1-(thiophen-2-yl)prop-2-en-1-ol (**18a**)

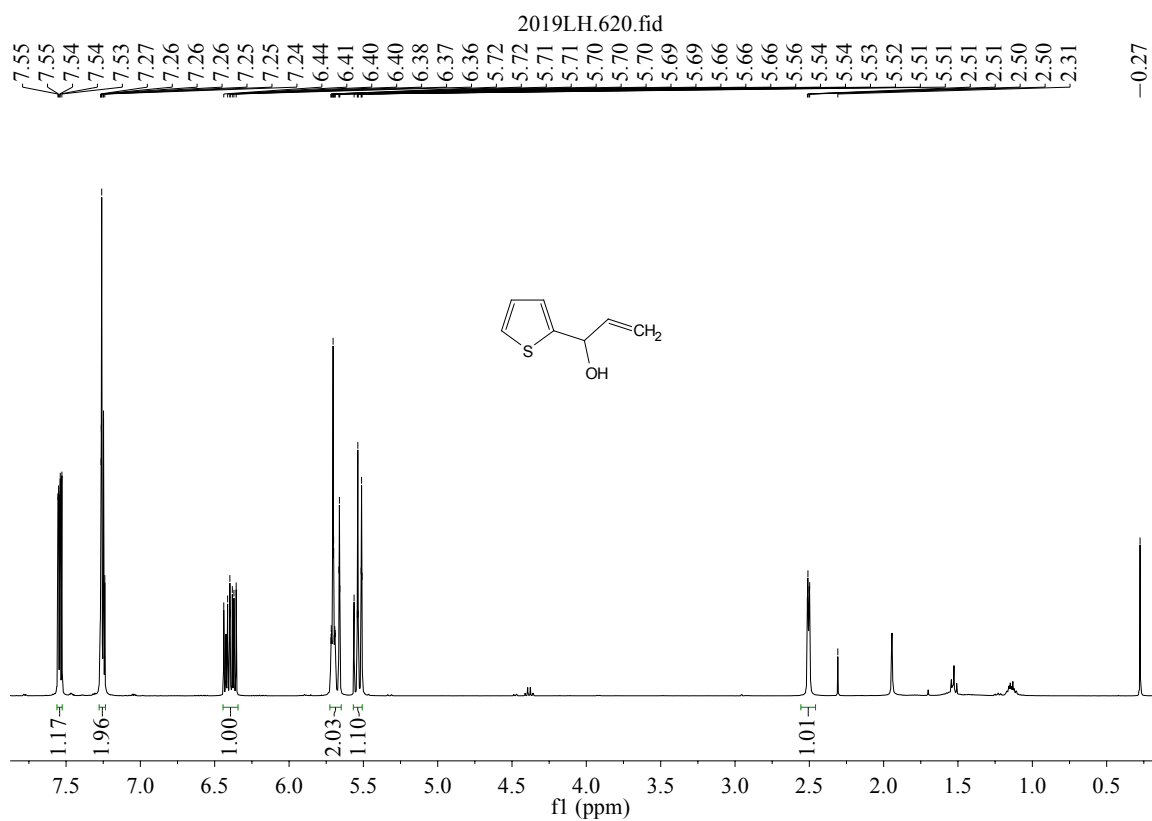

(S)-((R)-oxiran-2-yl)(thiophen-2-yl)methanol (**18b**)

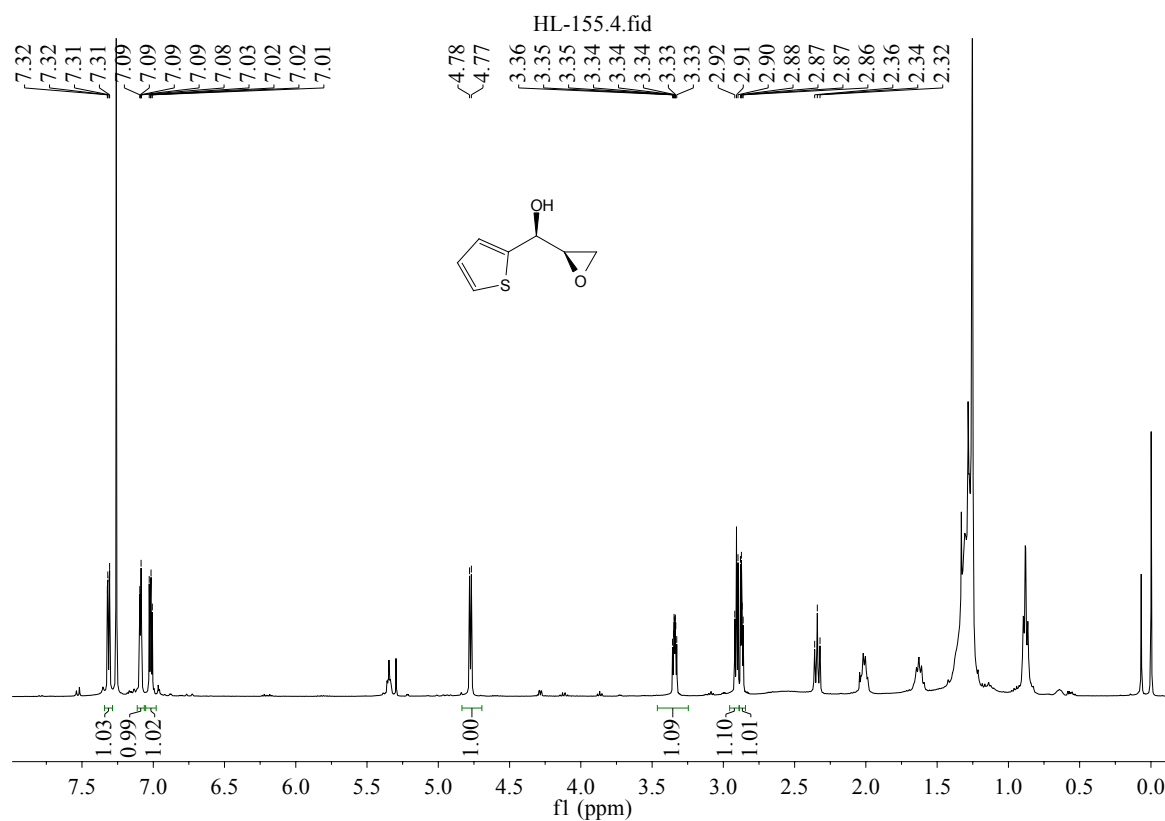

(S)-((R)-oxiran-2-yl)(thiophen-2-yl)methanol (**18b**)

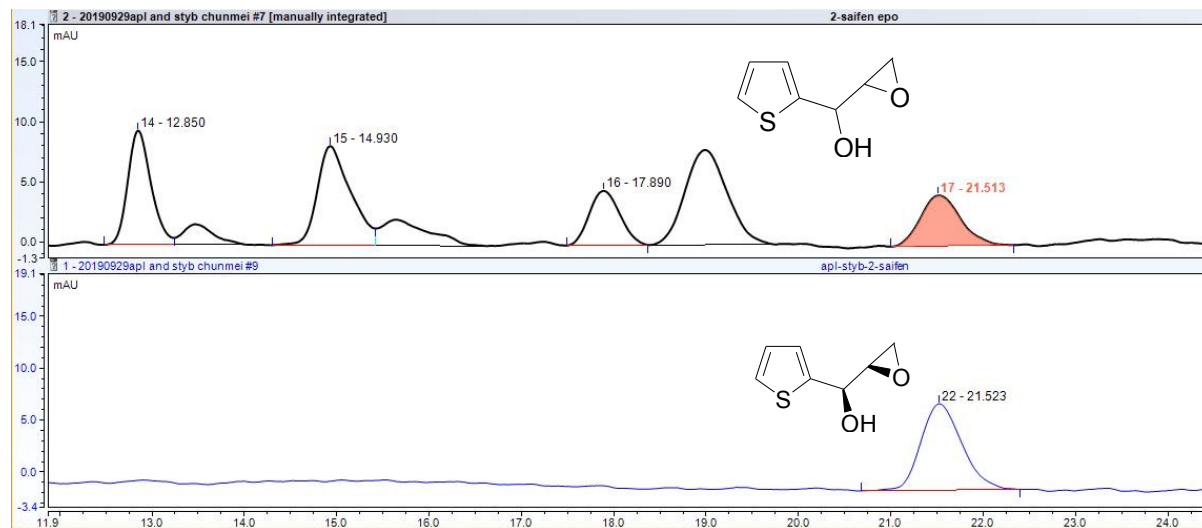

1-(thiophen-3-yl)prop-2-en-1-ol (**19a**)

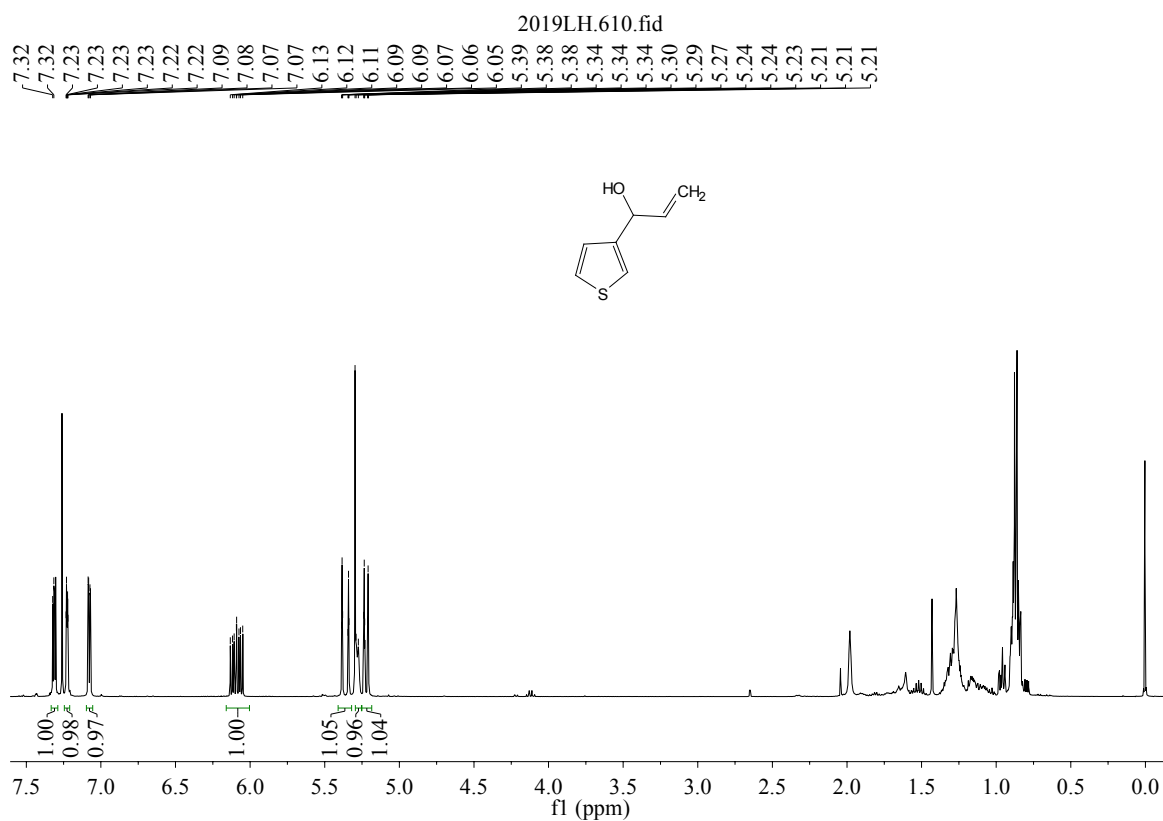

(S)-((R)-oxiran-3-yl)(thiophen-2-yl)methanol (**19b**)

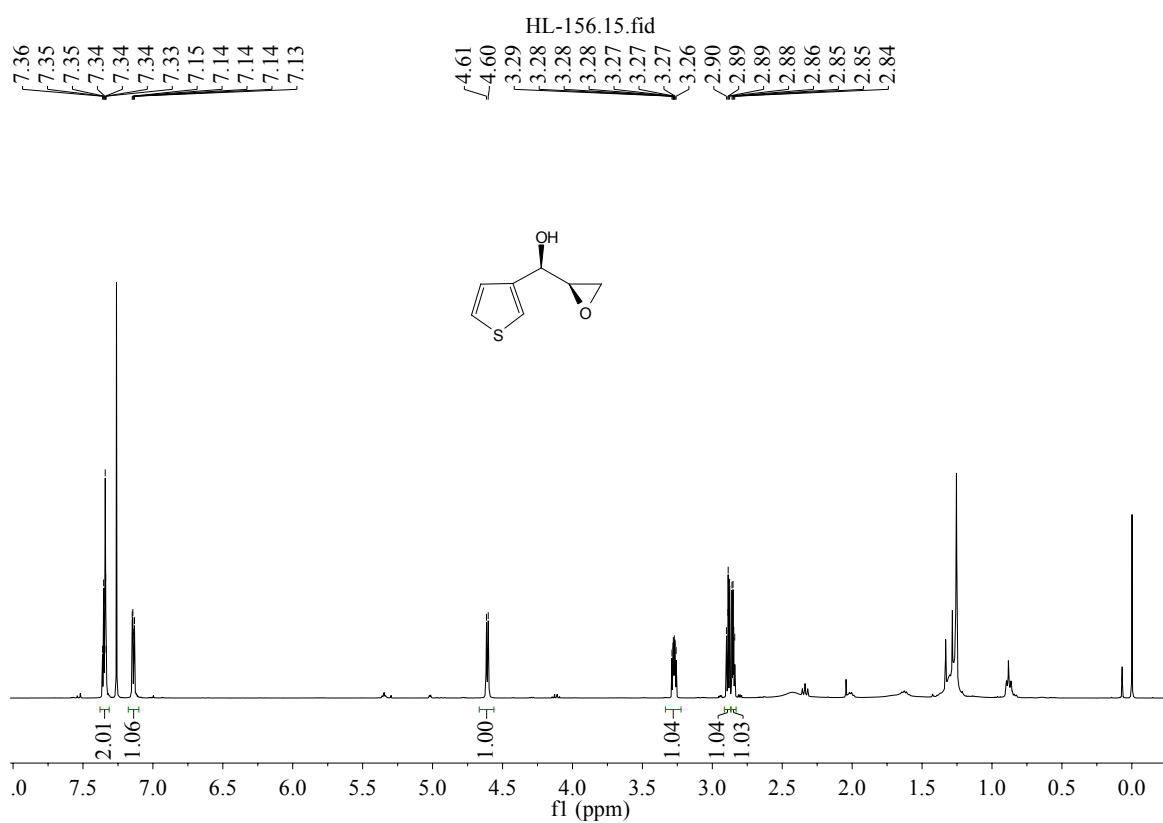

1-(oxiran-2-yl)-2-phenylethan-1-ol (**20a**)

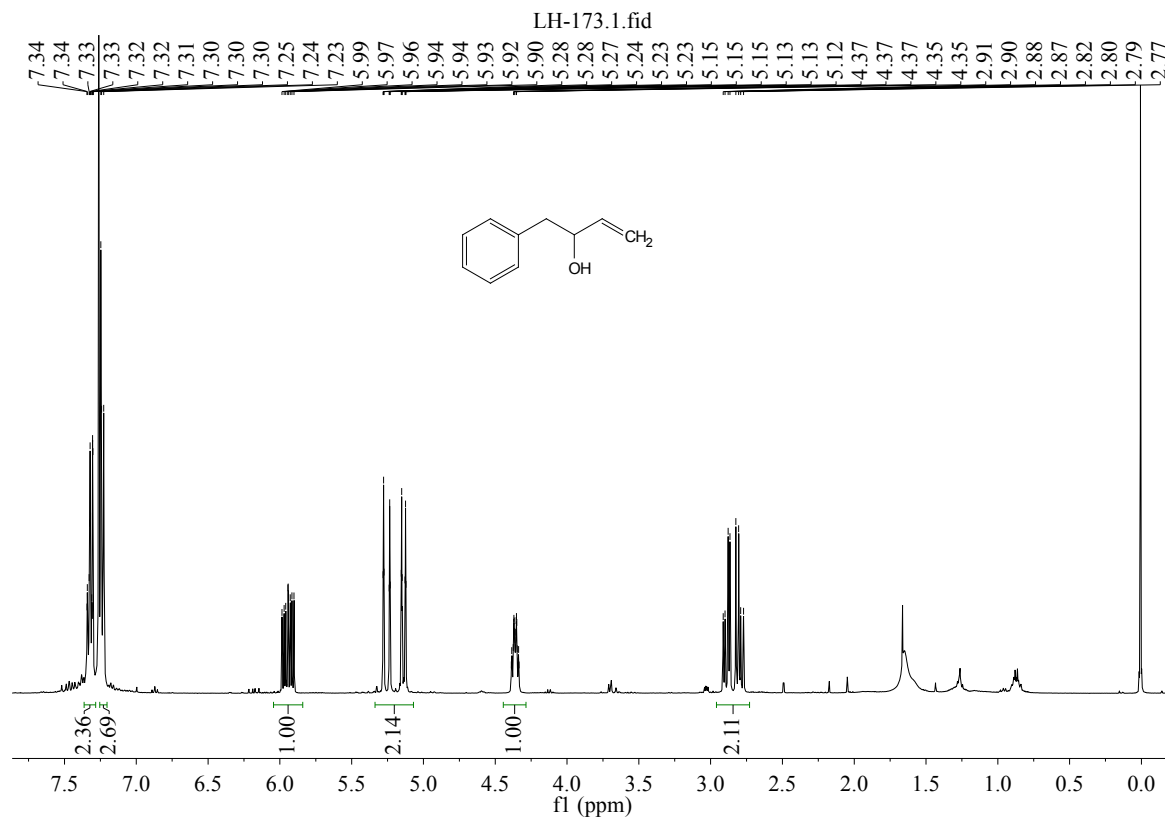

1-(oxiran-2-yl)-2-phenylethan-1-ol

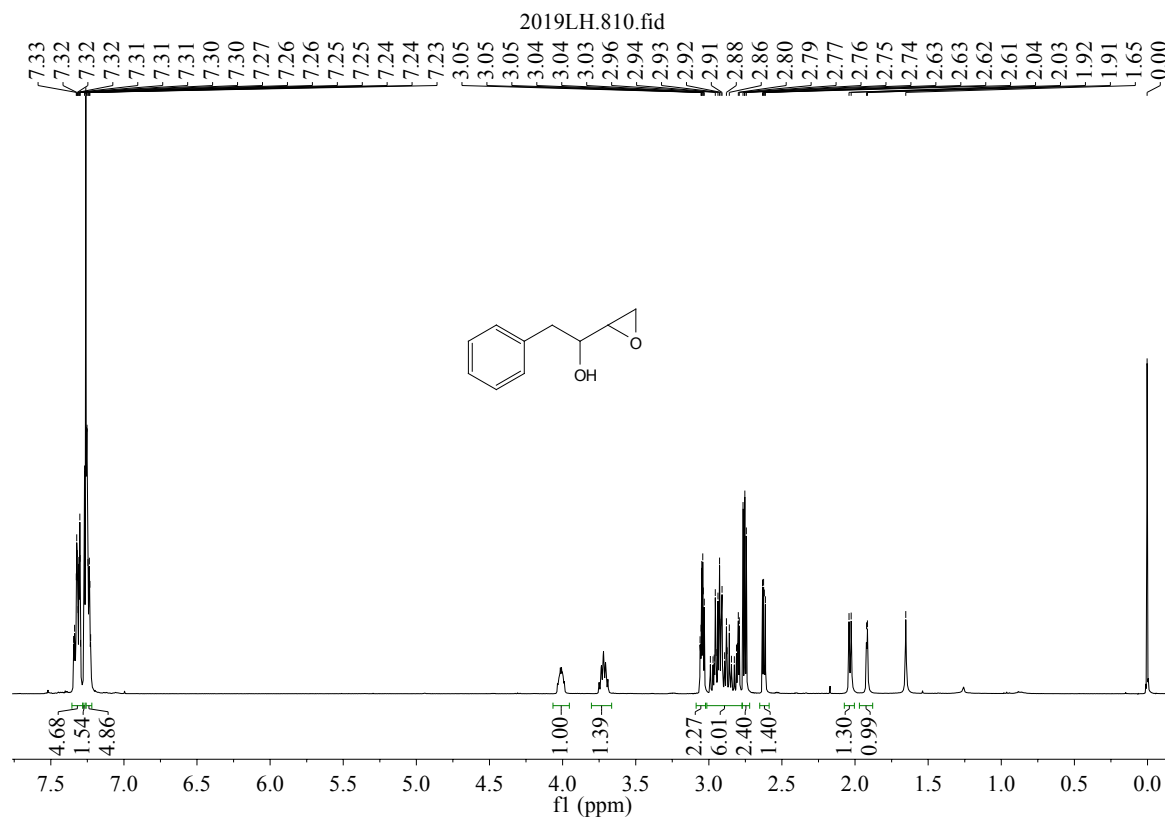

1-cyclohexylprop-2-en-1-ol (**21a**)

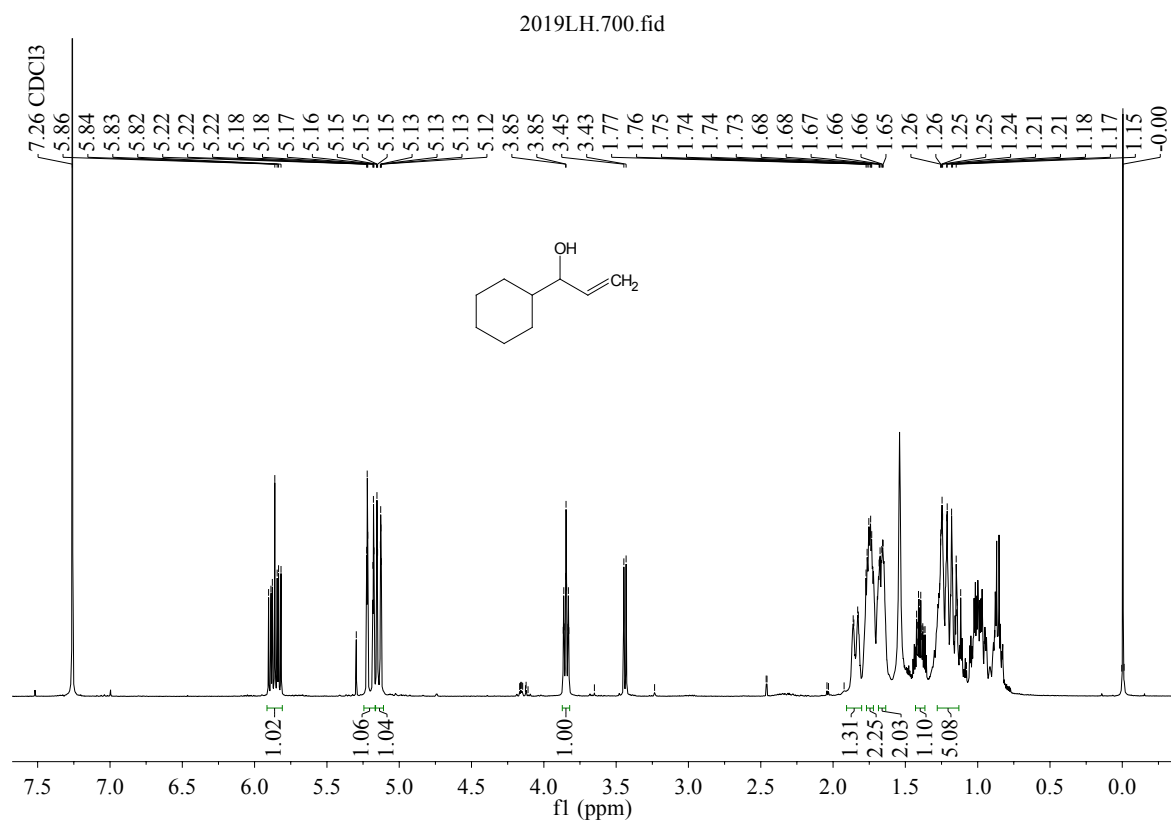

(*R*)-cyclohexyl(*R*-oxiran-2-yl)methanol (**21b**)

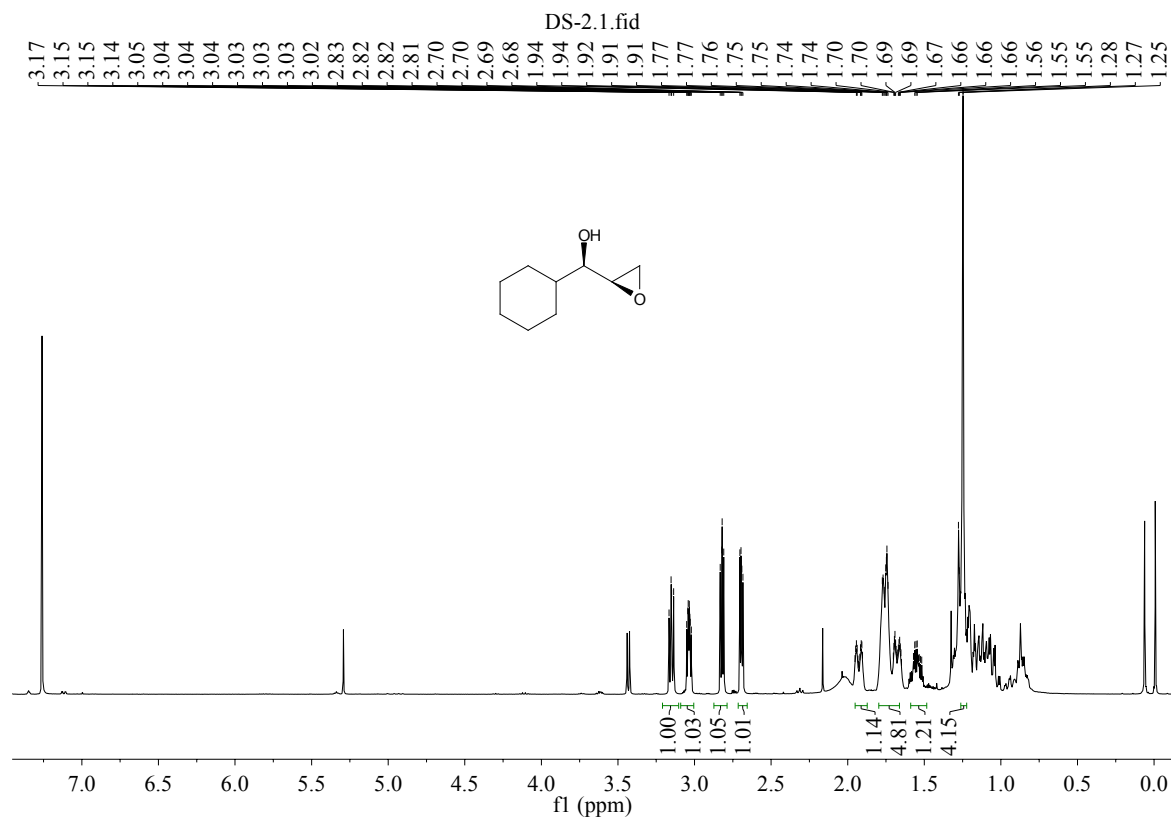



cyclohexyl(oxiran-2-yl)methanol

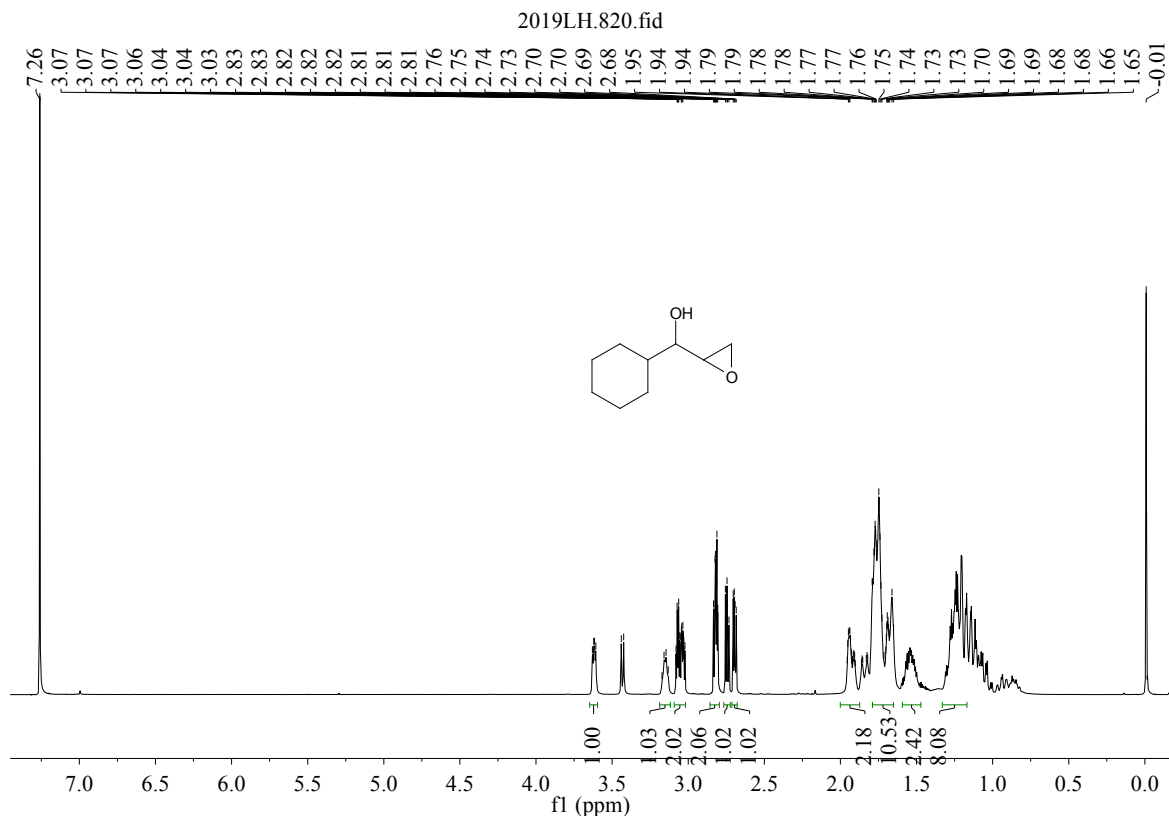

(*R*)-cyclohexyl(*R*-oxiran-2-yl)methanol (**21b**)

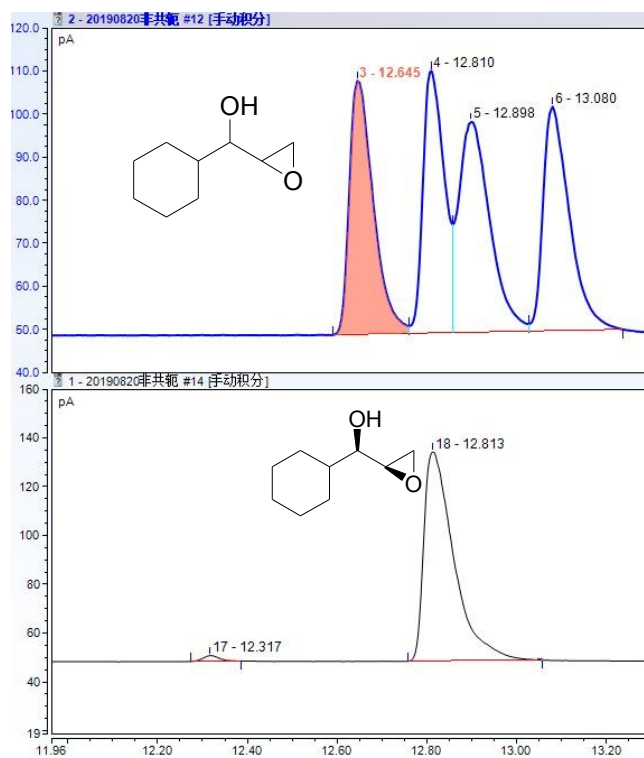

## 7. References

1. H. Lin, Y. Liu and Z.-L. Wu, *Chem. Commun.*, 2011, **47**, 2610-2612.
2. H. Lin, J. Qiao, Y. Liu and Z.-L. Wu, *J. Mol. Catal. B Enzym.*, 2010, **67**, 236-241.
